# Supplementary material for: Evolution of catalytic machinery: three-component nanorotor catalyzes formation of four-component catalytic machinery
Source: Royal Society of Chemistry journal article supplement (doi:10.1039/d1cc02805g), 2021-01-01
Supplement: d1cc02805g1.pdf [file d1cc02805g1.pdf]

## Electronic Supporting Information (ESI)

### **Evolution of catalytic machinery: Three-component nanorotor catalyzes formation of four-component catalytic machinery**

Abir Goswami,<sup>‡</sup> Merve S. Özer,<sup>‡</sup> Indrajit Paul and Michael Schmittel,\*

*Center for Micro- and Nanochemistry and Engineering, Organische Chemie I,  
Universität Siegen, D-57068 Siegen, Germany*

*<sup>‡</sup> Abir Goswami and Merve S. Özer contributed equally.*

*E-mail: [schmittel@chemie.uni-siegen.de](mailto:schmittel@chemie.uni-siegen.de)*

|    |                                                                                 |     |
|----|---------------------------------------------------------------------------------|-----|
| 1. | Synthesis                                                                       | S02 |
| 2. | Synthesis and characterization of complexes                                     | S05 |
| 3. | NMR spectra                                                                     | S09 |
| 4. | DOSY NMR spectra                                                                | S18 |
| 5. | Catalysis                                                                       | S19 |
| 6. | Variable temperature <sup>1</sup> H NMR and determination of kinetic parameters | S26 |
| 7. | ESI-MS spectra                                                                  | S28 |
| 8. | UV-Vis and fluorescence spectra                                                 | S30 |
| 9. | Estimation of hydrodynamic radius and energy minimized structures               | S31 |
| 10 | References                                                                      | S41 |

# 1. Synthesis

## General Section

All solvents were dried by distillation prior to use while the commercial reagents **4-7** were used without any further purification.  $^1\text{H}$  and  $^{13}\text{C}$  NMR spectra were recorded on Bruker Avance (400 MHz) and Varian VNMR-S (600 MHz) spectrometers using a deuterated solvent as the lock and residual protiated solvent as internal reference ( $\text{CDCl}_3$ :  $\delta_{\text{H}}$  7.26 ppm,  $\delta_{\text{C}}$  77.0 ppm;  $\text{CD}_2\text{Cl}_2$ :  $\delta_{\text{H}}$  5.32 ppm,  $\delta_{\text{C}}$  53.8 ppm). The following abbreviations were utilized to describe peak patterns: s = singlet, d = doublet, t = triplet, dd = doublet of doublets, td = triplet of doublets, dt = doublet of triplets, br = broad and m = multiplet. Electrospray-ionization (ESI) mass spectra were recorded on a Thermo-Quest LCQ deca. Melting points were measured on a Büchi SMP-20 and were left uncorrected. Infrared spectra were recorded using a Perkin Elmer Spectrum-Two FT-IR spectrometer. Elemental analysis measurements were measured using the EA 3000 CHNS. Energy minimized structures were obtained through DFT computations using the B3LYP functional in combination with the 6-31G(d) and LanL2DZ (for the metal ions) basis set. UV-vis spectra were recorded on a Cary Win 50 (298 K). The numbering of the carbon skeleton in molecular formulae as shown in the manuscript does not comply with the IUPAC nomenclature rules; it is only used for assignments of NMR signals. Compounds **1**,<sup>1</sup> **2**,<sup>2</sup> **3**,<sup>3</sup> **Phen**,<sup>4</sup> **S**<sup>5</sup> and **R**<sup>6</sup> were synthesized according to literature known procedures.

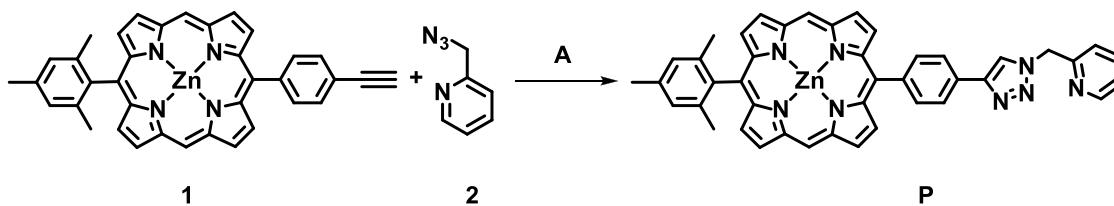

**Scheme 1.** Synthesis of ligand **P**. Reaction conditions: (A)  $[\text{Cu}(\text{CH}_3\text{CN})]\text{PF}_6$ ,  $\text{CH}_2\text{Cl}_2$ , room temperature, 24 h, 91%.

## Zinc(II)-5-(4-ethynylphenyl)-15-(2,4,6-trimethylphenyl)porphyrin (1)

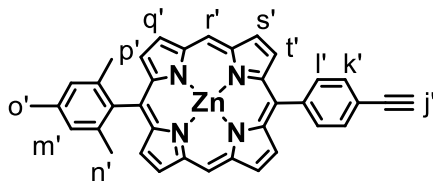

Compound **1** was prepared according to a literature method with all spectral data being in full agreement.<sup>1</sup> **MP** > 250 °C. **<sup>1</sup>H NMR** (400 MHz, CD<sub>2</sub>Cl<sub>2</sub>)  $\delta$  10.32 (s, 2H, r'-H), 9.47 (d, <sup>3</sup>J = 4.5 Hz, 2H, s'-H), 9.44 (d, <sup>3</sup>J = 4.5 Hz, 2H, q'-H), 9.11 (d, <sup>3</sup>J = 4.5 Hz, 2H, t'-H), 8.96 (d, <sup>3</sup>J = 4.5 Hz, 2H, p'-H), 8.25 (d, <sup>3</sup>J = 8.2 Hz, 2H, l'-H), 7.95 (d, <sup>3</sup>J = 8.2 Hz, 2H, k'-H), 7.35 (s, 2H, m'-H), 3.41 (s, 1H, j'-H), 2.67 (s, 3H, o'-H), 1.82 (s, 6H, n'-H). **<sup>13</sup>C NMR (100 MHz, CDCl<sub>3</sub>)**  $\delta$  = 21.4, 21.7, 31.5, 65.8, 82.2, 94.6, 105.9, 118.5, 118.9, 121.8, 127.7, 129.9, 131.4, 131.8, 132.0, 132.2, 134.4, 137.5, 138.6, 139.3, 142.8, 149.3, 149.5, 149.6, 149.9 ppm.

## Synthesis of ZnPor Platform (P)

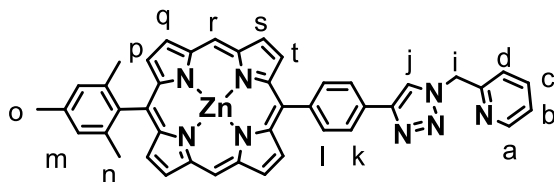

Porphyrin **1** (36.0 mg, 61.0  $\mu$ mol), 2-pyridylmethyl azide (**2**) (16.0 mg, 122  $\mu$ mol) and [Cu(CH<sub>3</sub>CN)<sub>4</sub>]PF<sub>6</sub> (4.50 mg, 6.10 mmol) were dissolved in 3 mL of CH<sub>2</sub>Cl<sub>2</sub> and allowed to stir at room temperature for 24 h. The product was separated by column chromatography eluting firstly with DCM and then 30% EtOAc in DCM (*R<sub>f</sub>* = 0.41) to give the product as a violet solid (40.0 mg, 55.5  $\mu$ mol, 91%). **MP** > 250 °C. **IR** (KBr)  $\tilde{\nu}$  2919, 2850, 1609, 1518, 1461, 1438, 1392, 1355, 1057, 995, 850, 784, 722, 701 cm<sup>-1</sup>; **<sup>1</sup>H NMR** (400 MHz, CD<sub>2</sub>Cl<sub>2</sub>:THF-d<sub>8</sub>, 80:20)  $\delta$  10.20 (s, 2H, r-H), 9.39 (d, <sup>3</sup>J = 4.4 Hz, 2H, s-H), 9.35 (d, <sup>3</sup>J = 4.4 Hz, 2H, q-H), 9.11 (d, <sup>3</sup>J = 4.4 Hz, 2H, t-H), 8.87 (d, <sup>3</sup>J = 4.4 Hz, 2H, p-H), 8.63 (dd, <sup>3</sup>J = 4.9 Hz, <sup>4</sup>J = 1.8 Hz, 1H, a-H), 8.31 (d, <sup>3</sup>J = 8.2 Hz, 2H, l-H), 8.29 (s, 1H, j-H), 8.26 (d, <sup>3</sup>J = 8.2 Hz, 2H, k-H), 7.78 (td, <sup>3</sup>J = 7.7 Hz, <sup>4</sup>J = 1.8 Hz, 1H, c-H), 7.36 (d, <sup>3</sup>J = 7.7 Hz, 1H, d-H), 7.32 (s, 2H, m-H), 7.27–7.24 (m, 1H, b-H), 5.79 (s, 2H, i-H), 2.65 (s, 3H, o-H), 1.81 (s, 6H, n-H); **<sup>13</sup>C NMR** (101 MHz, CD<sub>2</sub>Cl<sub>2</sub>)  $\delta$  155.3, 150.2, 150.2, 150.1, 149.8, 149.7, 148.3, 143.4, 139.7, 139.6, 137.8, 137.6, 135.6, 132.3, 132.2, 131.8, 131.2, 130.2, 128.0, 124.1, 123.7, 122.7, 121.2, 119.3, 118.1, 105.7, 56.0, 21.8, 21.5; **ESI-MS**:

$m/z$  (%) 724.5 (100)  $[M+H]^+$ ; **Anal. Calcd.** for  $C_{43}H_{32}N_8Zn$ : C, 71.12; H, 4.44; N, 15.43 found: C, 71.10; H, 4.35; N, 15.80.

**Synthesis of zinc(II)-*meso*-5,15-bis-{4-[2-(4-bromo-2,3,5,6-tetramethylphenyl)-9-(2,4,6-trimethylphenyl)-[1,10]phenanthrolinyl-3-ethynyl]phenyl}-10,20-bis-(2,4,6-trimethylphenyl)-porphyrin (Stator S). 5**

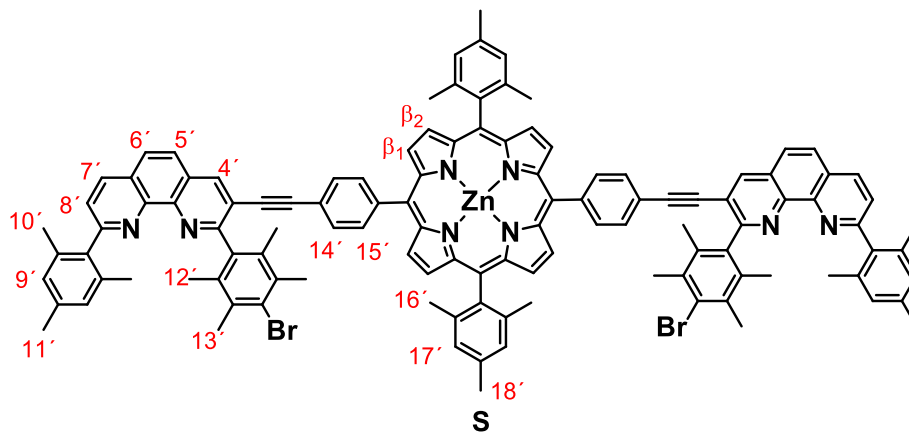

Stator **S** was prepared according to a literature method.<sup>5</sup>

**MP:** >300 °C; **IR** (KBr):  $\tilde{\nu}$  = 3441, 2963, 2914, 2733, 2362, 2201, 1913, 1804, 1701, 1602, 1491, 1442, 1263, 1162, 1093, 994, 846, 802, 765, 722, 573  $\text{cm}^{-1}$ ;  **$^1\text{H}$  NMR (400 MHz,  $\text{CDCl}_3$ ):**  $\delta$  = 8.85 (d, 4H,  $^3J$  = 4.6 Hz,  $\beta_1$ -H), 8.79 (d, 4H,  $^3J$  = 4.6 Hz,  $\beta_2$ -H), 8.63 (s, 2H, 4'-H), 8.33 (d,  $^3J$  = 8.4 Hz, 2H, 7'-H), 8.17 (d,  $^3J$  = 8.0 Hz, 4H, 15'-H), 7.95 (d, 2H,  $^3J$  = 9.0 Hz, 6'/5'-H), 7.92 (d,  $^3J$  = 9.0 Hz, 2H, 5'/6'-H), 7.61 (d,  $^3J$  = 8.4 Hz, 2H, 8'-H), 7.49 (d,  $^3J$  = 8.0 Hz, 4H, 14'-H), 7.29 (s, 4 H, 17'-H), 6.96 (s, 4 H, 9'-H), 2.64 (s, 6H, 18'-H), 2.53 (s, 12H, 12'-H), 2.33 (s, 6H, 11'-H), 2.16 (s, 12H, 13'-H), 2.13 (s, 12H, 10'-H), 1.83 (s, 12H, 16'-H);  **$^{13}\text{C}$  NMR (100 MHz  $\text{CDCl}_3$ ):**  $\delta$  = 162.6, 160.7, 150.0, 149.7, 145.9, 144.7, 143.4, 139.2, 139.2, 138.9, 138.5, 137.9, 137.6, 137.5, 136.1, 136.0, 134.5, 133.8, 133.7, 132.1, 131.0, 129.7, 129.3, 128.5, 127.7, 127.7, 127.2, 127.0, 125.7, 125.2, 121.8, 120.2, 119.6, 119.3, 95.7, 87.8, 21.6, 21.5, 21.1, 21.1, 20.5, 18.7; **ESI-MS:**  $m/z$  (%) = 1825.6 (60)  $[M+H]^+$ , 913.4 (100)  $[M+2H]^{2+}$ ; **UV-Vis:**  $\lambda_{\text{abs}}$  ( $\text{CH}_2\text{Cl}_2$ ) = 422, 549, 595 nm;  $\epsilon_{422} = 2.17 \times 10^4 \text{ M}^{-1}\text{cm}^{-1}$ .

## Spectroscopic data for rotator **R**<sup>7</sup>

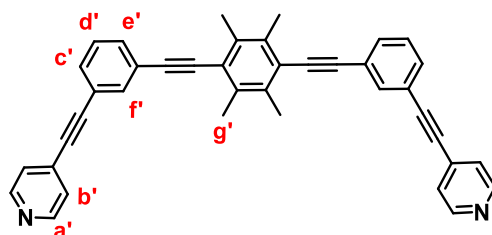

Compound **R** was prepared according to a literature method.<sup>7</sup> **MP**: 210-212 °C; **IR (KBr)**:  $\tilde{\nu}$  = 3050, 2923, 2211, 1593, 1569, 1537, 1489, 1478, 1404, 1375, 1315, 1214, 1090, 1066, 1014, 988, 936, 919, 820, 795, 748, 686, 646, 587, 565, 544, 533, 497  $\text{cm}^{-1}$ ; **<sup>1</sup>H NMR (400 MHz, CD<sub>2</sub>Cl<sub>2</sub>)**:  $\delta$  = 8.61 (d, <sup>3</sup>*J* = 6.0 Hz, 4H, a'-H), 7.74 (t, <sup>4</sup>*J* = 1.6 Hz, 2H, f'-H), 7.57 (dt, <sup>3</sup>*J* = 8.0 Hz, <sup>4</sup>*J* = 1.6 Hz, 2H, e'/c'-H), 7.52 (dt, <sup>3</sup>*J* = 8.0 Hz, <sup>4</sup>*J* = 1.6 Hz, 2H, c'/e'-H), 7.40 (d, <sup>3</sup>*J* = 6.0 Hz, 4H, b'-H), 7.38 (t, <sup>3</sup>*J* = 8.0 Hz, 2H, d'-H), 2.51 (s, 12H, g'-H) ppm; **<sup>13</sup>C NMR (100 MHz, CDCl<sub>3</sub>)**:  $\delta$  = 149.8, 135.8, 134.4, 131.9, 131.3, 131.1, 128.6, 125.5, 124.3, 123.2, 122.5, 97.1, 93.1, 89.5, 87.2, 18.4 ppm; **ESI-MS**: *m/z* (%) 537.4 (100) [R + H]<sup>+</sup>.

## 2. Synthesis and characterization of complexes

**Complex C1** = Synthesis of model complex [Cu(**Phen**)(**P**)]PF<sub>6</sub>

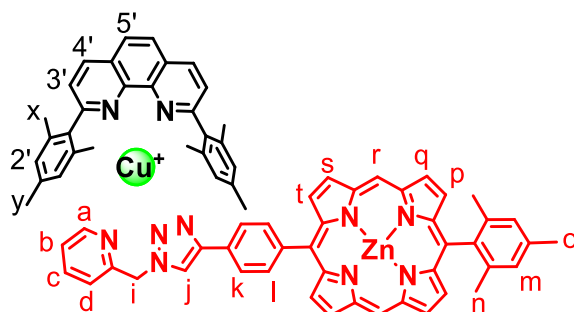

Compound **Phen** (430  $\mu\text{g}$ , 1.03  $\mu\text{mol}$ ), product **P** (750  $\mu\text{g}$ , 1.03  $\mu\text{mol}$ ) and [Cu(CH<sub>3</sub>CN)<sub>4</sub>]PF<sub>6</sub> (384  $\mu\text{g}$ , 1.03  $\mu\text{mol}$ ) were dissolved in 550  $\mu\text{L}$  of CH<sub>2</sub>Cl<sub>2</sub> and sonicated for 1 min to quantitatively furnish [Cu(**Phen**)(**P**)]PF<sub>6</sub>. **IR (KBr)**  $\tilde{\nu}$  2920, 2853, 1610, 1589, 1439, 1388, 1385, 1057, 995, 842, 791, 557  $\text{cm}^{-1}$ ; **<sup>1</sup>H NMR (400 MHz, CD<sub>2</sub>Cl<sub>2</sub>)**:  $\delta$  10.33 (s, 2H, r-H), 9.48 (d, <sup>3</sup>*J* = 4.4 Hz, 2H, s-H), 9.44 (d, <sup>3</sup>*J* = 4.4 Hz, 2H, q-H), 9.17 (d, <sup>3</sup>*J* = 4.4 Hz, 2H, t-H), 8.96 (d, <sup>3</sup>*J* = 4.4 Hz, 2H, p-H), 8.69 (d, <sup>3</sup>*J* = 8.3 Hz, 2H, 4'-H), 8.33 (d, <sup>3</sup>*J* = 7.8 Hz, 2H, l-H), 8.19 (s, 2H, 5'-H), 8.14 (d, <sup>3</sup>*J*

= 7.8 Hz, 2H, k-H), 8.13 (s, 1H, j-H) 7.89 (d,  $^3J = 8.3$  Hz, 2H, 3'-H), 7.80 (br s, 1H, c-H), 7.70 (br s, 1H, a-H), 7.46 (br s, 1H, d-H), 7.34 (s, 2H, m-H), 7.14 (br s, 1H, b-H), 6.73 (s, 4H, 2'-H), 4.36 (s, 2H, i-H), 2.66 (s, 3H, o-H), 2.24 (s, 6H, y-H), 1.94 (s, 12H, x-H), 1.80 (s, 6H, n-H); **ESI-MS**:  $m/z$  (%) 1205.3 (100)  $[M - PF_6]^+$ ; **Anal. Calcd.** for  $C_{81}H_{72}CuF_6N_{14}PZn \cdot 1/2CH_2Cl_2$ : C, 62.83; H, 4.72; N, 12.59. Found: C, 62.61; H, 4.35; N, 12.39.

**Complex C2 = Synthesis of Deck** =  $[Cu_2(S)(P)_2](PF_6)_2$

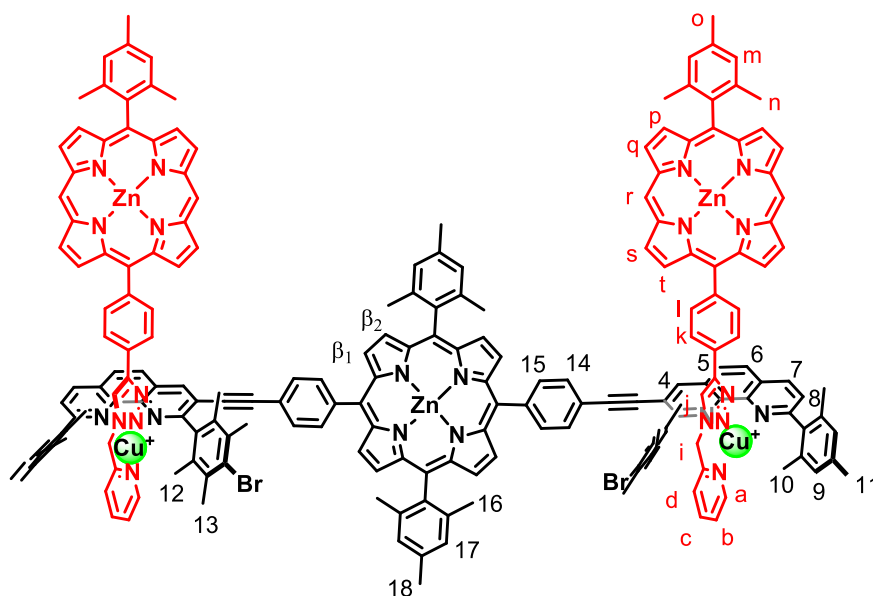

Stator **S** (1.17 mg, 0.641  $\mu$ mol), product **P** (932  $\mu$ g, 1.28  $\mu$ mol) and  $[Cu(CH_3CN)_4]PF_6$  (477  $\mu$ g, 1.28  $\mu$ mol) were dissolved in 550  $\mu$ L of  $CH_2Cl_2$  and sonicated for 1 min to quantitatively afford  $[Cu_2(S)(P)_2](PF_6)_2$ . **IR** (KBr)  $\tilde{\nu}$  2919, 2860, 2206, 1619, 1550, 1461, 1438, 1384, 1332, 1203, 1057, 995, 844, 720, 557  $cm^{-1}$ ;  **$^1H$  NMR** (400 MHz,  $CD_2Cl_2$ )  $\delta$  10.30 (s, 4H, r-H), 9.46 (br s, 4H, s-H), 9.42 (d,  $^3J = 4.5$  Hz, 4H, q-H), 9.16 (d,  $^3J = 4.5$  Hz, 4H, t-H), 8.99 (s, 2H, 4-H), 8.95 (d,  $^3J = 4.5$  Hz, 4H, p-H), 8.83 (d,  $^3J = 4.7$  Hz, 4H,  $\beta_1$ -H), 8.76 (d,  $^3J = 4.7$  Hz, 1H,  $\beta_2$ -H), 8.73 (d,  $^3J = 8.3$  Hz, 2H, 7-H), 8.33 (br s, 4H, l-H), 8.26 (s, 4H, [5+6]-H), 8.17 (d,  $^3J = 7.8$  Hz, 4H, 15-H), 8.16 (s, 2H, j-H), 8.15 (br s, 4H, k-H), 7.93 (d,  $^3J = 8.3$  Hz, 2H, 8-H), 7.87 (br s, 4H, [a+c]-H), 7.51 (d,  $^3J = 7.8$  Hz, 4H, 14-H), 7.48 (br s, 2H, d-H), 7.34 (s, 4H, m-H), 7.29 (s, 4H, 17-H), 7.23 (s, 2H, b-H), 6.78 (s, 4H, 9-H), 4.43 (br s, 4H, i-H), 2.66 (s, 6H, o-H), 2.60 (s, 6H, 18-H), 2.32 (s, 12H, 12-H), 2.29 (s, 6H, 11-H), 2.13 (s, 12H, 10-H), 1.95 (s, 12H, 13-H), 1.80 (s, 24H, [n+16]-H); **ESI-MS**:  $m/z$  (%) 1701.5 (25)  $[M - 2PF_6]^{2+}$ . **Anal. Calcd.** for  $C_{218}H_{182}Br_2Cu_2F_{12}N_{32}P_2Zn_3 \cdot 2CH_3CN$ : C, 64.95; H, 4.62; N, 11.60. Found: C, 65.03; H, 4.66; N, 11.29.

**Complex C3 = Rotor [Cu<sub>2</sub>(S)(R)]<sup>2+</sup>**

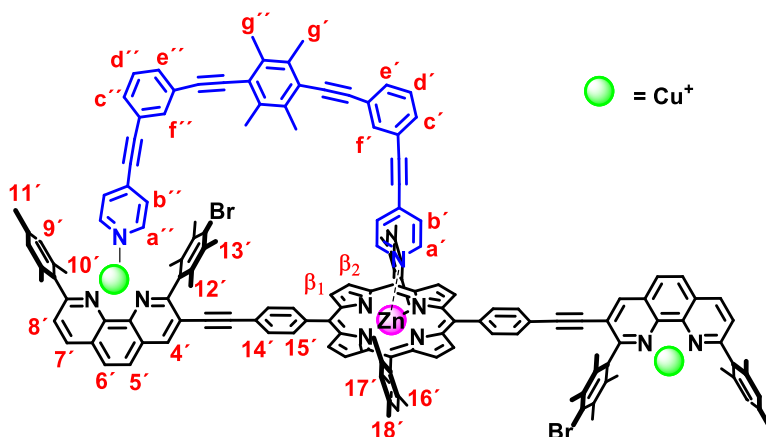

Compound **S** was prepared according to literature method.<sup>5</sup>

**MP** > 250 °C; **IR** (KBr):  $\tilde{\nu}$  = 3036, 2919, 2209, 1605, 1491, 1459, 1382, 1336, 1203, 1064, 996, 843, 796, 719, 683, 623, 560 cm<sup>-1</sup>; **<sup>1</sup>H NMR** (400 MHz, CD<sub>2</sub>Cl<sub>2</sub>):  $\delta$  8.95 (s, 2H, 4'-H), 8.80 (d, 4H, <sup>3</sup>J = 4.4 Hz,  $\beta_1$ -H), 8.76 (d, <sup>3</sup>J = 8.4 Hz, 2H, 7'-H), 8.74 (d, 4H, <sup>3</sup>J = 4.4 Hz,  $\beta_2$ -H), 8.26 (d, 2H, <sup>3</sup>J = 8.8 Hz, 6'/5'-H), 8.23 (d, <sup>3</sup>J = 8.8 Hz, 2H, 5'/6'-H), 8.15 (d, <sup>3</sup>J = 7.8 Hz, 4H, 15'-H), 7.98 (d, <sup>3</sup>J = 8.4 Hz, 2H, 8'-H), 7.69 (brs, 2H, f'-, f''-H), 7.56 (d, <sup>3</sup>J = 7.8 Hz, 2H, e'-, e''-H), 7.47 (d, <sup>3</sup>J = 7.8 Hz, 2H, c'-, c''-H), 7.36-7.42 (m, 6H, d'-, d''-, 14'-H), 7.29 (s, 4H, 17'-H), 7.03 (s, 4H, 9'-H), 6.89 (brs, 4H, b'-H), 5.66 (brs at -60 °C, 4H, a'-H), 2.61 (s, 6H, 18'-H), 2.43 (s, 12H, g''-, g'-H), 2.13 (s, 12H, 12'-H), 2.38 (s, 6H, 11'-H), 2.14 (s, 12H, 13'-H), 2.10 (s, 12H, 10'-H), 1.79 (s, 12H, 16'-H); **ESI-MS**:  $m/z$  (%) = 1244.7 (100) [[Cu<sub>2</sub>(S)(R)]<sup>2+</sup>]; **UV-Vis**:  $\lambda_{\text{abs}}$  (CH<sub>2</sub>Cl<sub>2</sub>) = 429, 559, 602, 607 nm;  $\epsilon_{429}$  = 1.96 × 10<sup>4</sup> M<sup>-1</sup>cm<sup>-1</sup>; **Anal. Calcd.** for C<sub>156</sub>H<sub>122</sub>Br<sub>2</sub>Cu<sub>2</sub>F<sub>12</sub>N<sub>10</sub>P<sub>2</sub>Zn: C, 67.42; H, 4.43; N, 5.04. Found: C, 67.50; H, 4.41; N, 5.26.

**Complex C4** = Slider-on-deck [Cu<sub>2</sub>(**S**)(**R**)(**P**)<sub>2</sub>](PF<sub>6</sub>)<sub>2</sub>

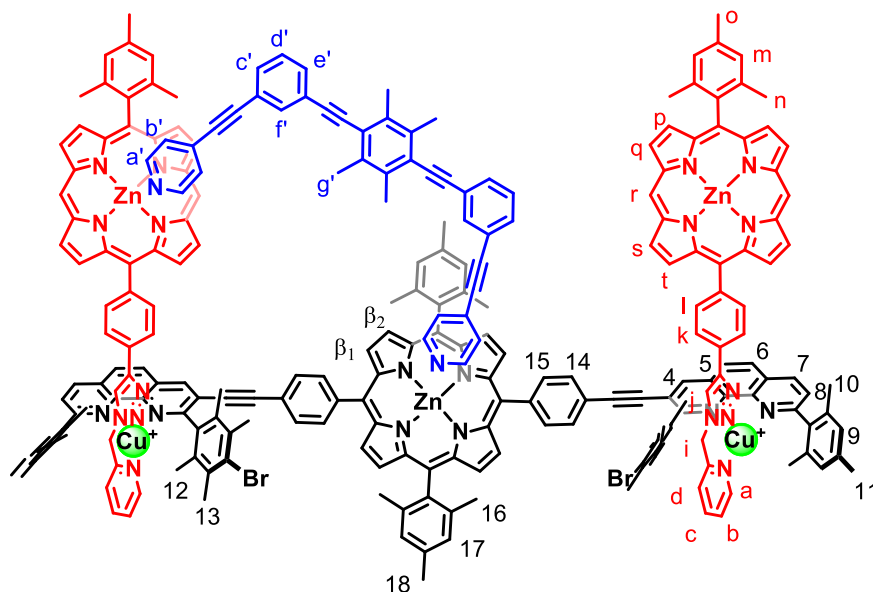

In an NMR tube, stator **S** (1.17 mg, 0.641  $\mu\text{mol}$ ), product **P** (932  $\mu\text{g}$ , 1.28  $\mu\text{mol}$ ), rotator **R** (344  $\mu\text{g}$ , 0.641  $\mu\text{mol}$ ) and [Cu(CH<sub>3</sub>CN)<sub>4</sub>]PF<sub>6</sub> (477  $\mu\text{g}$ , 1.28  $\mu\text{mol}$ ) were dissolved in 550  $\mu\text{L}$  of CH<sub>2</sub>Cl<sub>2</sub> and sonicated for 1 min to quantitatively afford [Cu<sub>2</sub>(**S**)(**R**)(**P**)<sub>2</sub>](PF<sub>6</sub>)<sub>2</sub>. **IR** (KBr)  $\tilde{\nu}$  2922, 2853, 2206, 1604, 1461, 1438, 1384, 1260, 1201, 1057, 994, 843, 794, 722, 557 cm<sup>-1</sup>; **<sup>1</sup>H NMR** (400 MHz, CD<sub>2</sub>Cl<sub>2</sub>)  $\delta$  10.22 (s, 4H, r-H), 9.42 (br s, 4H, s-H), 9.36 (br s, 4H, q-H), 9.13 (br s, 4H, t-H), 8.96 (s, 2H, 4-H), 8.90 (d, <sup>3</sup>J = 4.4 Hz, 4H, p-H), 8.78 (d, <sup>3</sup>J = 4.6 Hz, 4H,  $\beta_1$ -H), 8.71 (d, <sup>3</sup>J = 4.6 Hz, 4H,  $\beta_2$ -H), 8.71 (d, <sup>3</sup>J = 8.3 Hz, 2H, 7-H), 8.33 (d, <sup>3</sup>J = 7.5 Hz, 4H, l-H), 8.23 (s, 4H, [5+6]-H), 8.16 (d, <sup>3</sup>J = 7.9 Hz, 4H, 15-H), 8.15 (s, 2H, j-H), 8.14 (d, <sup>3</sup>J = 7.5 Hz, 4H, k-H), 7.92 (d, <sup>3</sup>J = 8.3 Hz, 2H, 8-H), 7.82 (br s, 4H, [a+c]-H), 7.48 (d, <sup>3</sup>J = 7.9 Hz, 4H, 14-H), 7.43 (br s, 2H, d-H), 7.35 (br s, 2H, d'-H), 7.32 (s, 4H, m-H), 7.27 (s, 4H, 17-H), 7.15 (br s, 6H, [b+c'+e']-H), 7.09 (s, 2H, f'-H), 6.79 (br s, 4H, 9-H), 5.77 (br s, 4H, b'-H), 4.37 (br s, 4H, i-H), 3.69 (br s, 4H a'-H at -70 °C), 2.65 (s, 6H, o-H), 2.59 (s, 6H, 18-H), 2.30 (s, 6H, 11-H), 2.28 (s, 24H, [g'+12]-H), 2.11 (s, 12H, 10-H), 1.95 (s, 12H, 13-H), 1.78 (s, 24H, [n+16]-H); **ESI-MS**: *m/z* (%) 1970.8 (20) [M - 2PF<sub>6</sub>]<sup>2+</sup>. **Anal. Calcd.** for C<sub>258</sub>H<sub>210</sub>Br<sub>2</sub>Cu<sub>2</sub>F<sub>12</sub>N<sub>34</sub>P<sub>2</sub>Zn<sub>3</sub>•CH<sub>2</sub>Cl<sub>2</sub>: C, 66.98; H, 4.60; N, 10.25. Found: C, 67.05; H, 4.56; N, 9.96.



### 3. NMR spectra

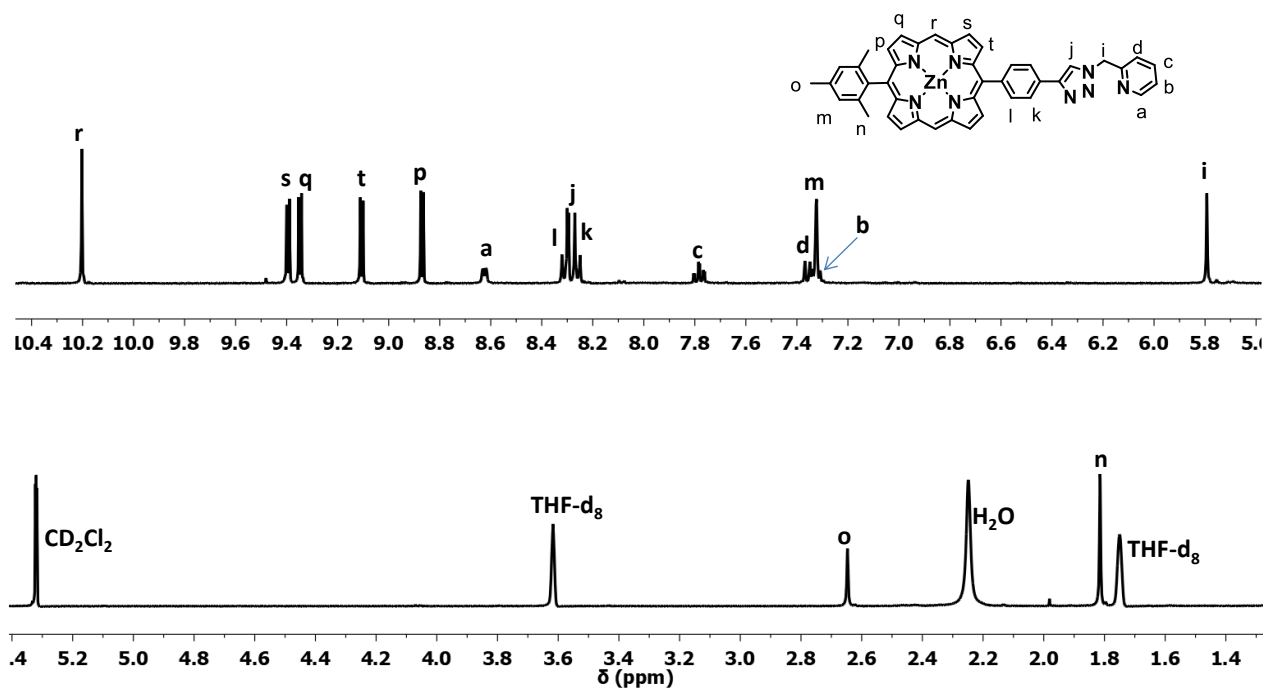

Figure S1.  $^1\text{H}$  NMR (400 MHz,  $\text{CD}_2\text{Cl}_2:\text{THF-d}_8$ , 80:20) of compound **P**.

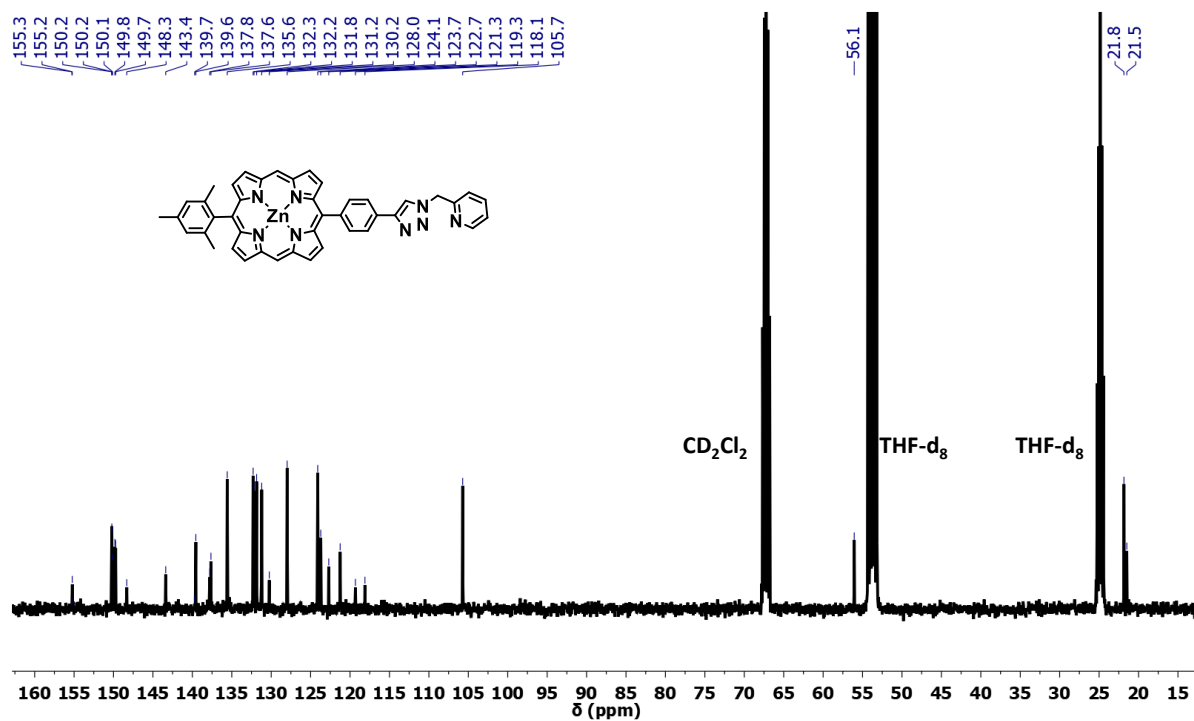

**Figure S2.** <sup>13</sup>C NMR (101 MHz, CD<sub>2</sub>Cl<sub>2</sub>:THF-d<sub>8</sub>, 80:20) of compound **P**.

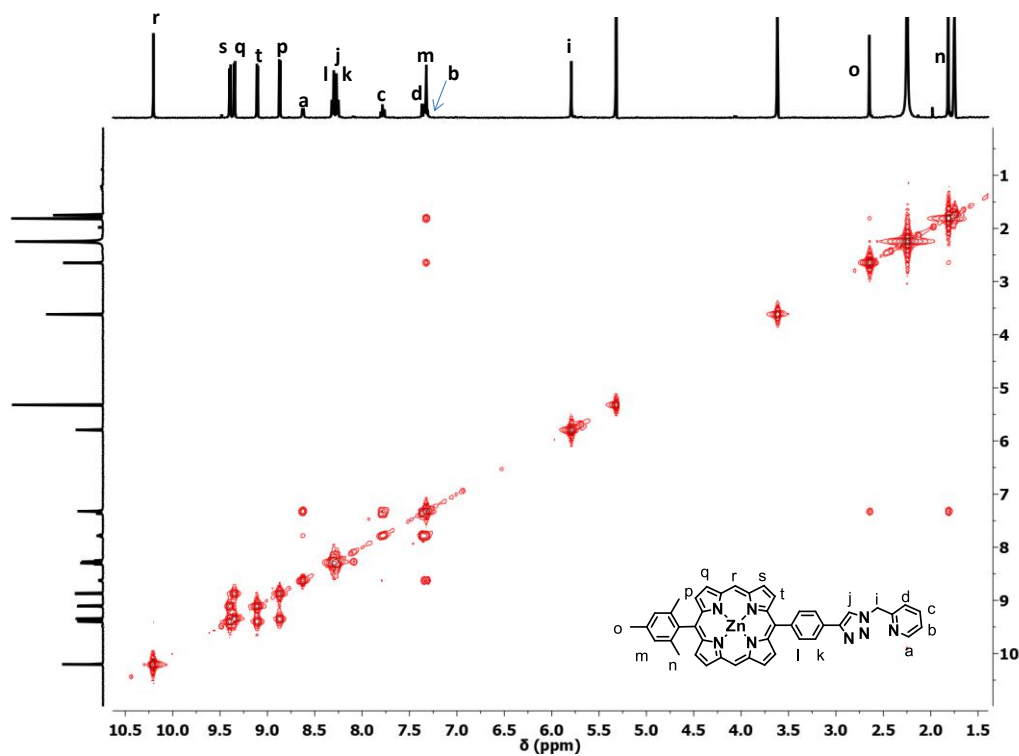

**Figure S3.** <sup>1</sup>H-<sup>1</sup>H COSY (400 MHz, CD<sub>2</sub>Cl<sub>2</sub>:THF-d<sub>8</sub>, 80:20) of compound **P**.

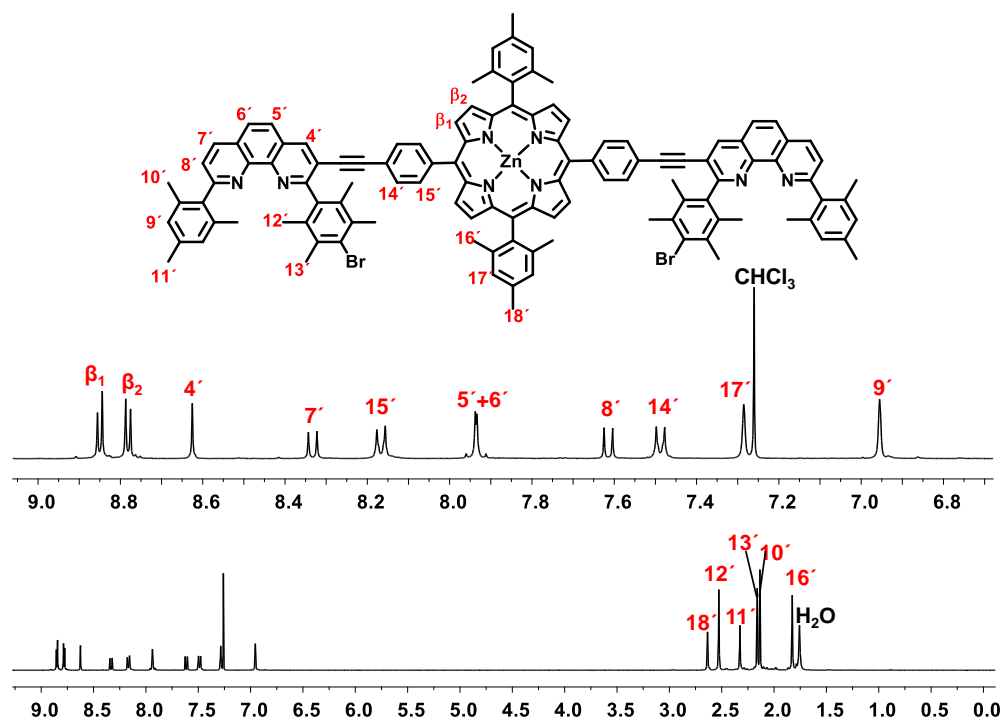

Figure S4.  $^1\text{H}$  NMR spectrum of stator **S** in  $\text{CDCl}_3$  (400 MHz, 298 K).

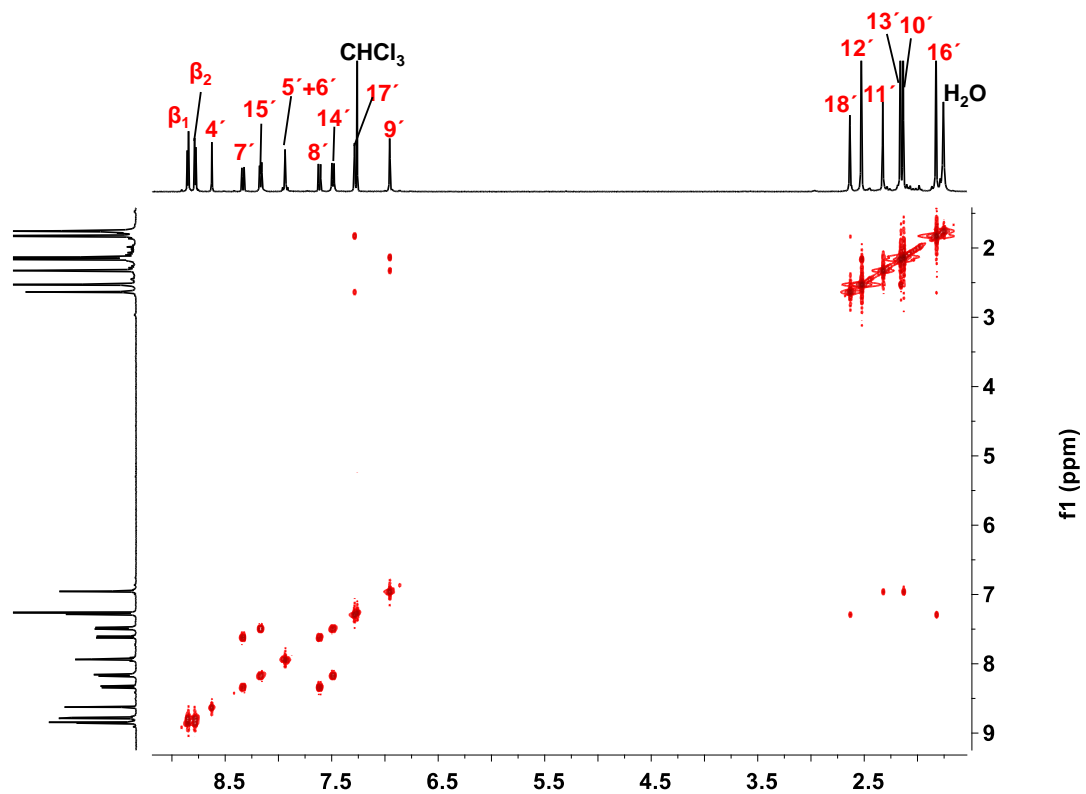

Figure S5.  $^1\text{H}$ - $^1\text{H}$  COSY spectrum of stator **S** in  $\text{CDCl}_3$  (400 MHz, 298 K).

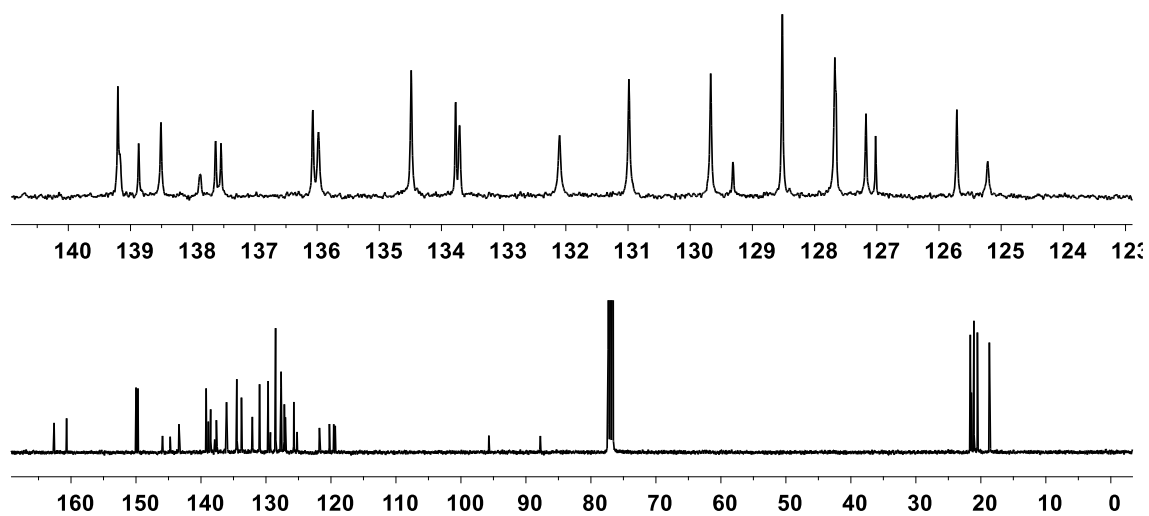

**Figure S6.**  $^{13}\text{C}$  NMR spectrum of stator **S** in  $\text{CDCl}_3$  (100 MHz, 298 K).

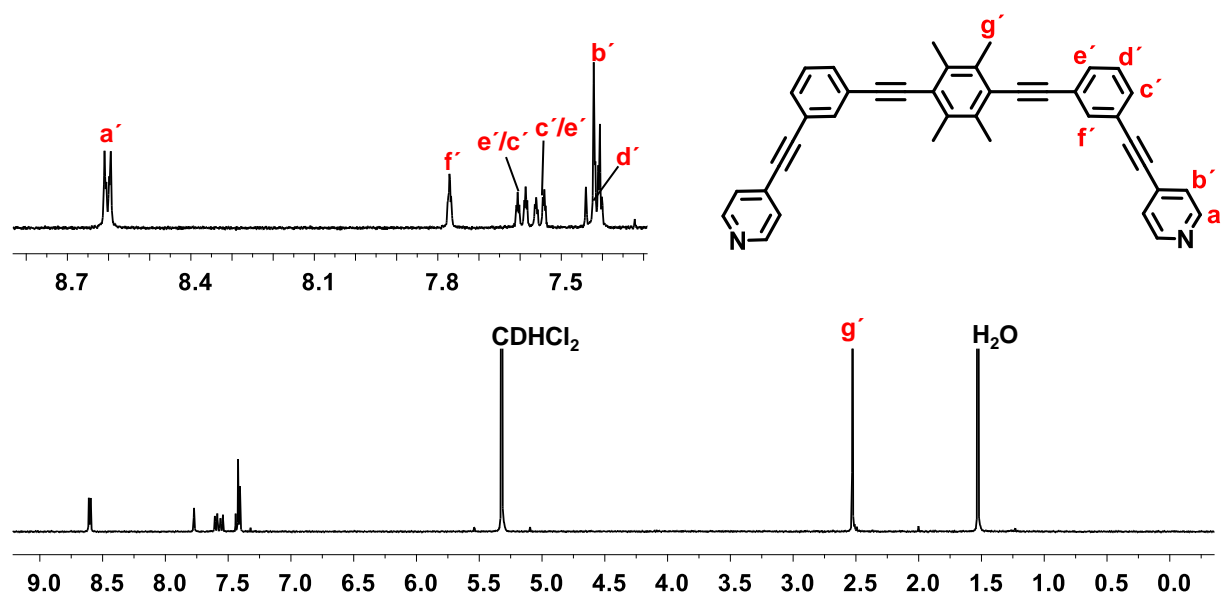

**Figure S7.**  $^1\text{H}$  NMR spectrum of rotator ligand **R** in  $\text{CD}_2\text{Cl}_2$  (400 MHz, 298 K).

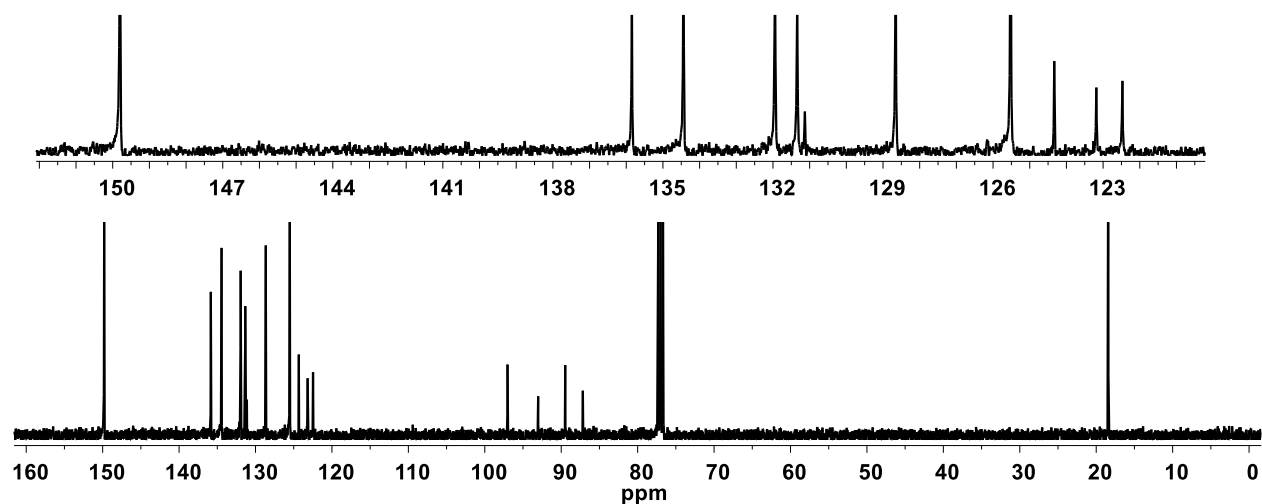

Figure S8.  $^{13}\text{C}$  NMR spectrum of rotator **R** in  $\text{CDCl}_3$  (100 MHz, 298 K).

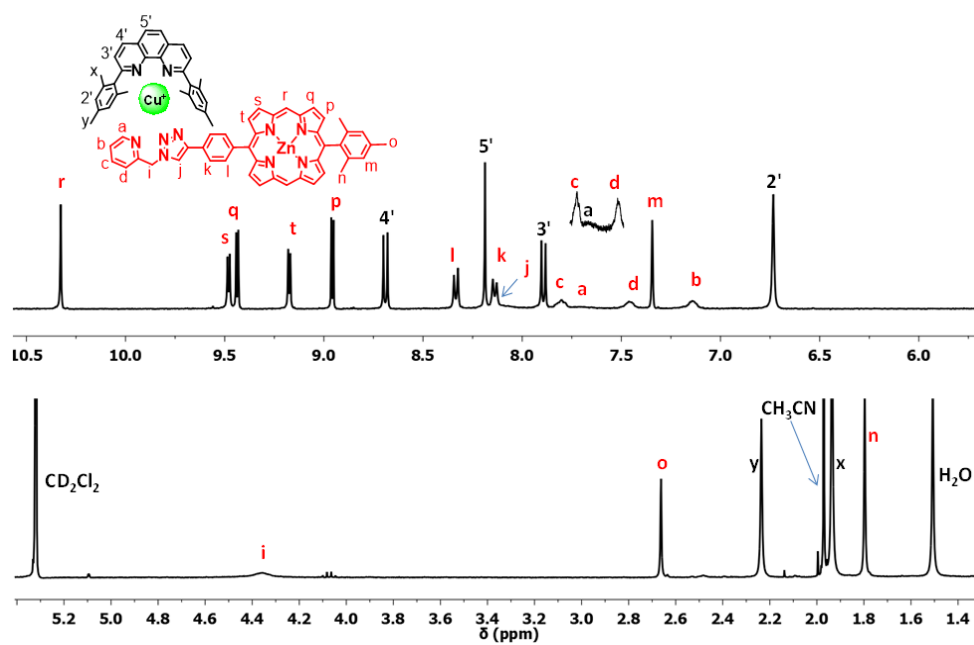

Figure S9.  $^1\text{H}$  NMR (400 MHz,  $\text{CD}_2\text{Cl}_2$ ) of  $[\text{Cu}(\text{Phen})(\text{P})]\text{PF}_6$ .

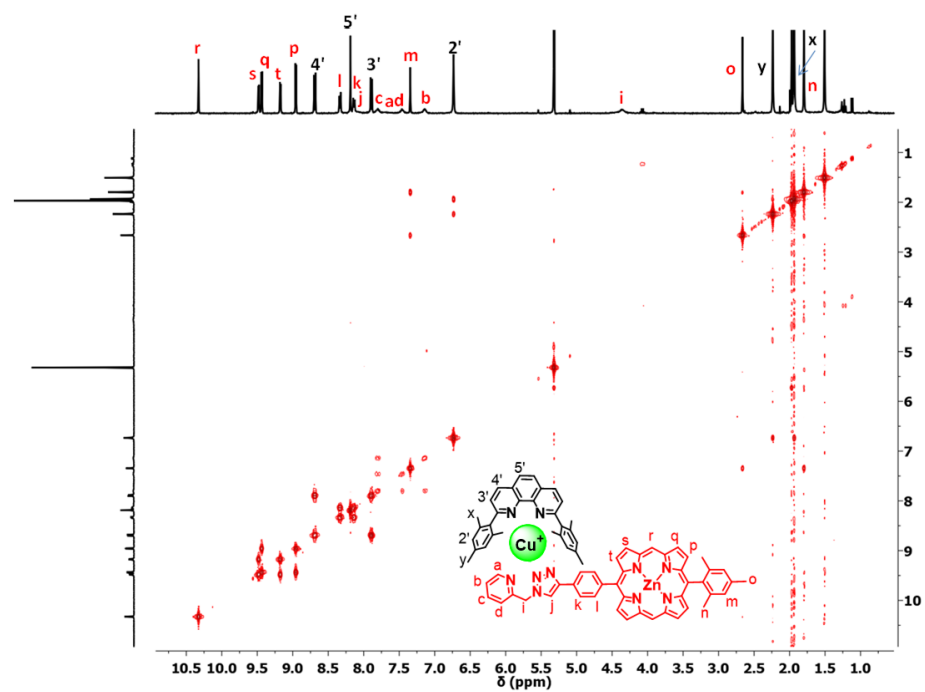

**Figure S10.**  $^1\text{H}$ - $^1\text{H}$  COSY (400 MHz,  $\text{CD}_2\text{Cl}_2$ ) of  $[\text{Cu}(\text{phen})(\text{P})]\text{PF}_6$ .

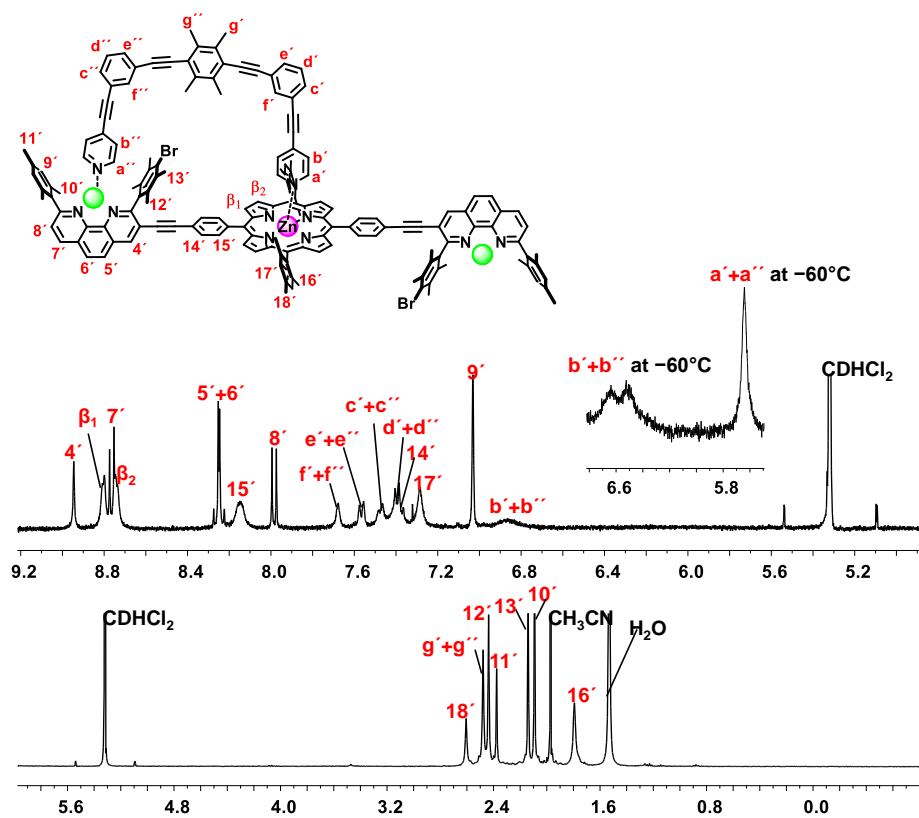

Figure S11.  $^1\text{H}$  NMR spectrum (400 MHz, 298 K) of complex  $[\text{Cu}_2(\text{S})(\text{R})]^{2+}$  in  $\text{CD}_2\text{Cl}_2$ .

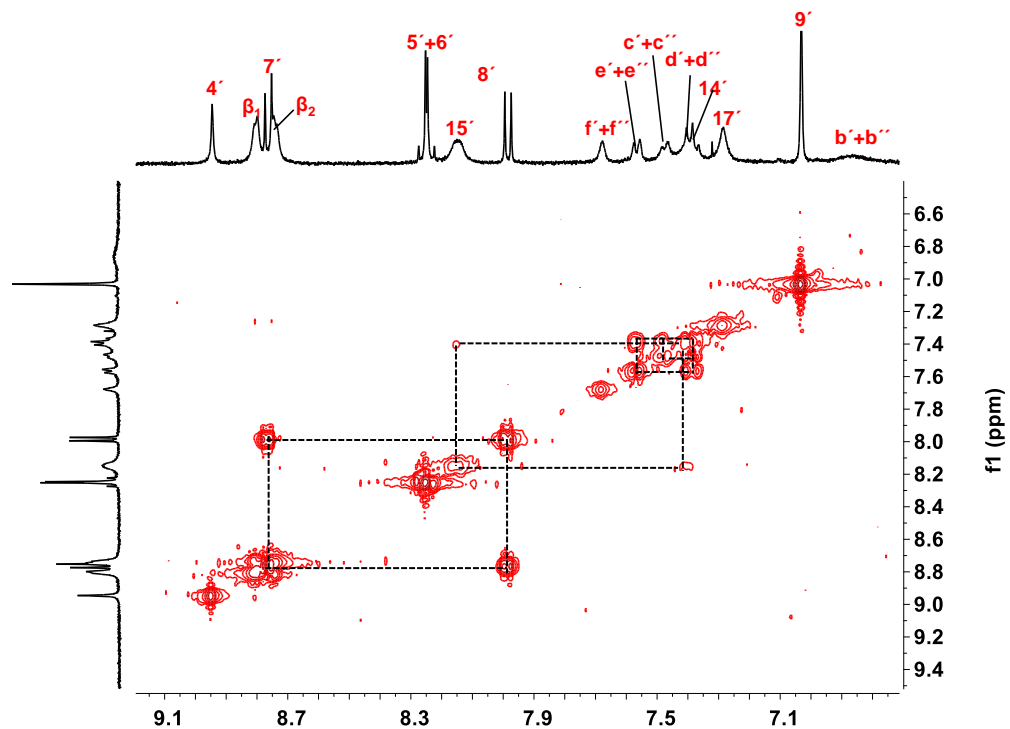

Figure S12.  $^1\text{H}$ - $^1\text{H}$  COSY spectrum (400 MHz, 298 K) of complex  $[\text{Cu}_2(\text{S})(\text{R})]^{2+}$  in  $\text{CD}_2\text{Cl}_2$ .

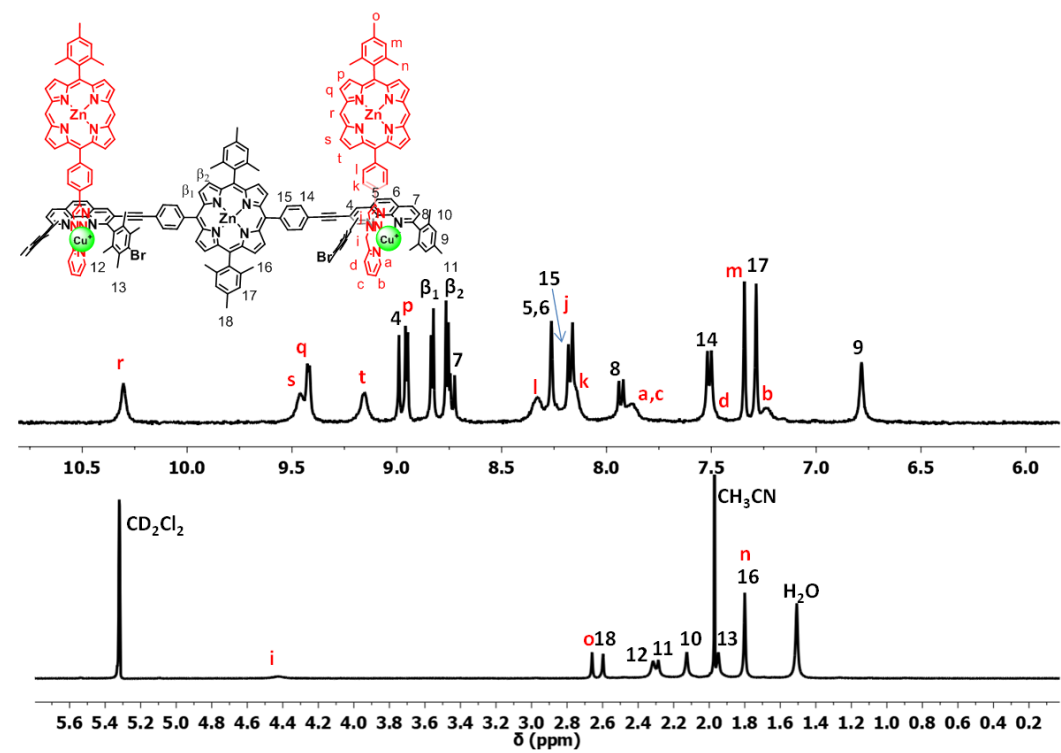

Figure S13.  $^1\text{H}$  NMR (400 MHz,  $\text{CD}_2\text{Cl}_2$ ) of  $[\text{Cu}_2(\text{S})(\text{P})_2](\text{PF}_6)_2$ .

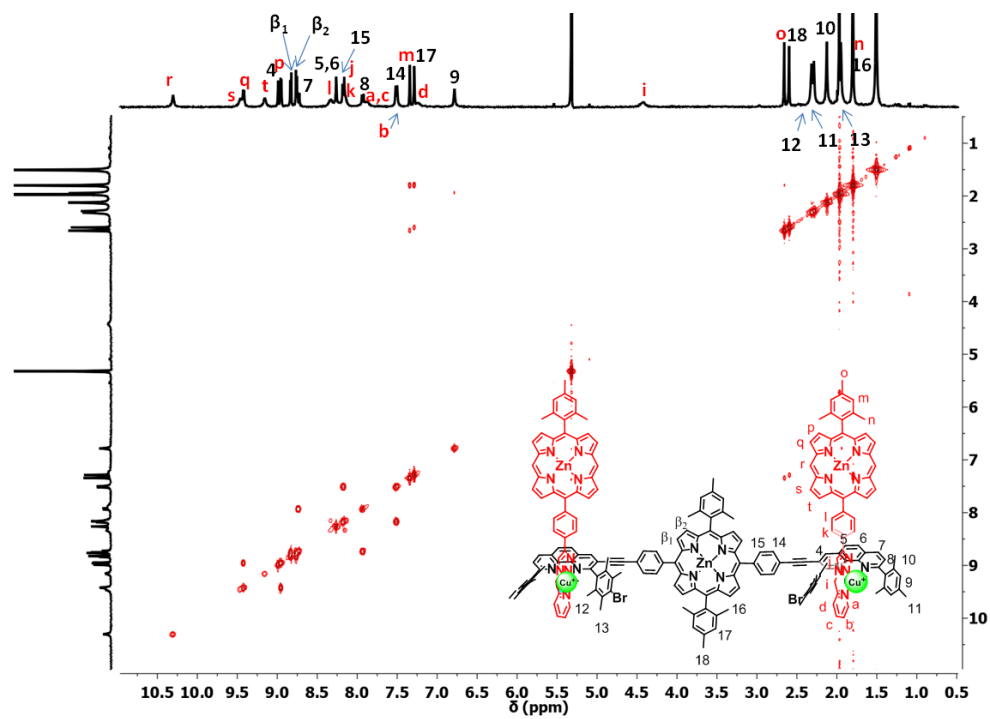

Figure S14.  $^1\text{H}$ - $^1\text{H}$  COSY (400 MHz,  $\text{CD}_2\text{Cl}_2$ ) of  $[\text{Cu}_2(\text{S})(\text{P})_2](\text{PF}_6)_2$ .



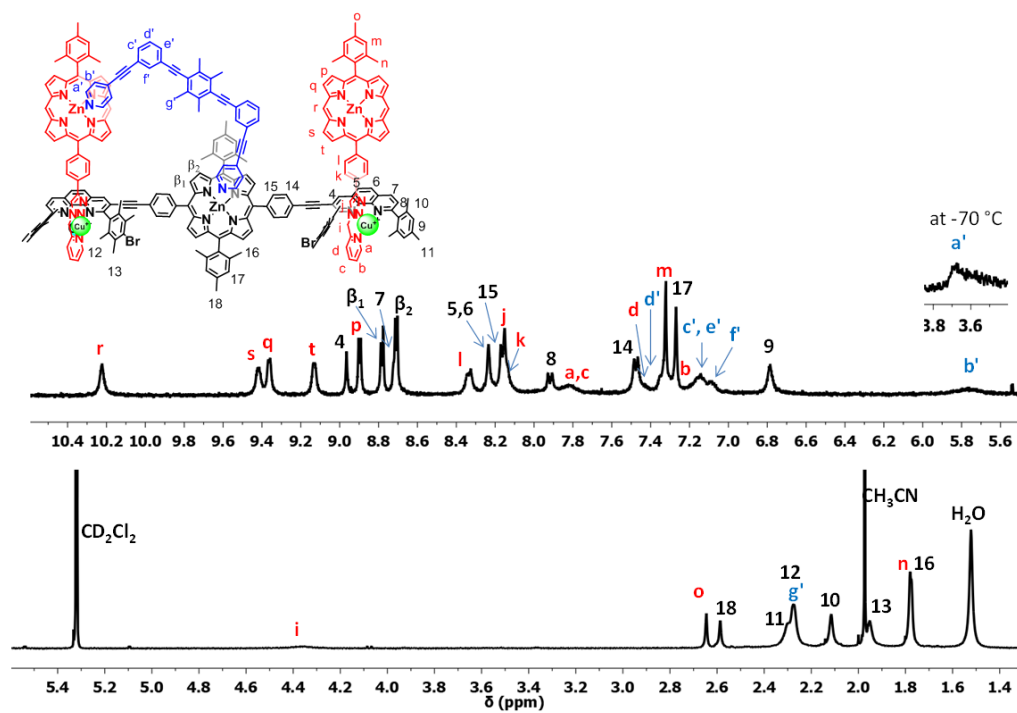

Figure S15.  $^1\text{H}$  NMR (400 MHz,  $\text{CD}_2\text{Cl}_2$ ) of  $[\text{Cu}_2(\text{S})(\text{R})(\text{P})_2](\text{PF}_6)_2$ .

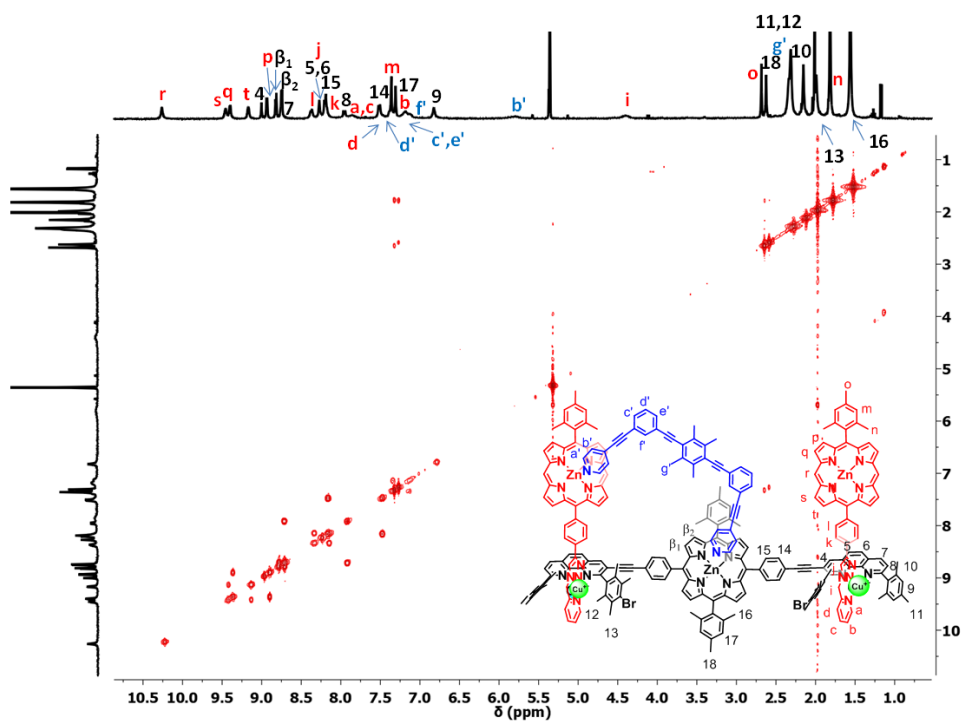

Figure S16.  $^1\text{H}$ - $^1\text{H}$  COSY (400 MHz,  $\text{CD}_2\text{Cl}_2$ ) of  $[\text{Cu}_2(\text{S})(\text{R})(\text{P})_2](\text{PF}_6)_2$ .

## 4. DOSY NMR spectra

### Calculation of hydrodynamic radius from:

For  $[\text{Cu}_2(\text{S})(\mathbf{R})(\mathbf{P})_2](\text{PF}_6)_2$  and  $[\text{Cu}_2(\mathbf{S})(\mathbf{P})_2](\text{PF}_6)_2$  the diffusion coefficient  $D$  was obtained from the DOSY spectrum. The corresponding hydrodynamic radius was calculated by using the Stokes-Einstein equation

$$r = k_B T / 6\pi\eta D$$

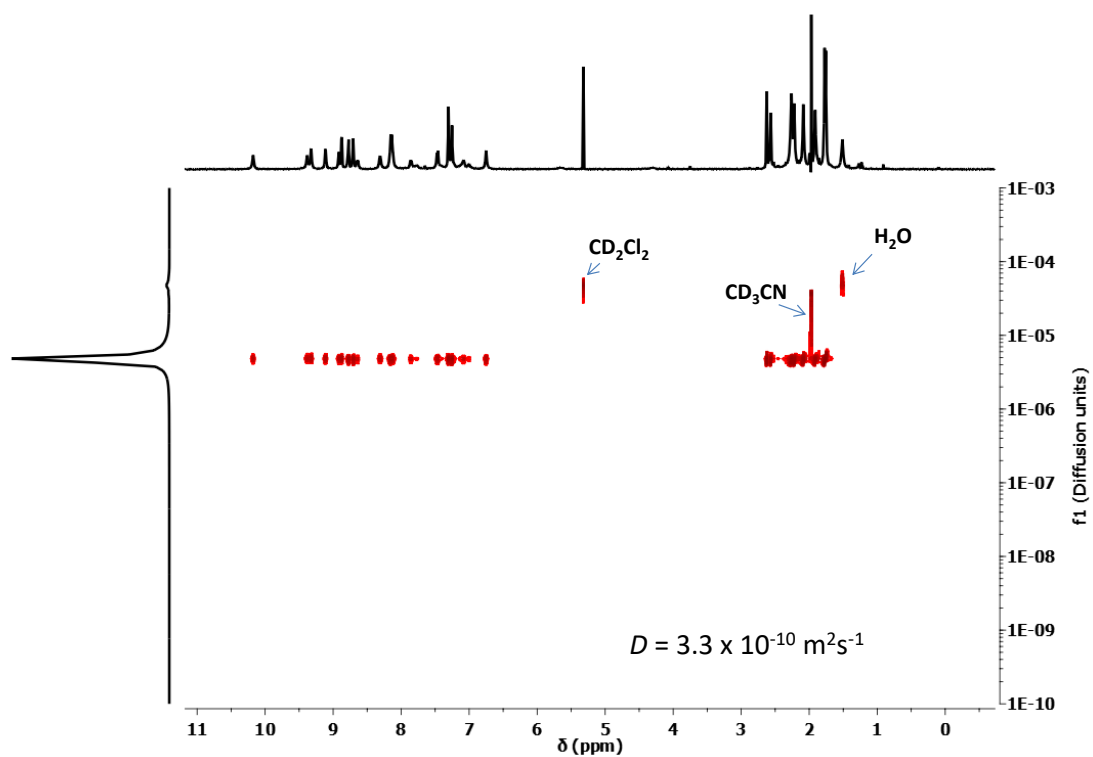

**Figure S17.**  $^1\text{H}$  DOSY NMR (600 MHz,  $\text{CD}_2\text{Cl}_2$ ) of  $[\text{Cu}_2(\text{S})(\mathbf{R})(\mathbf{P})_2](\text{PF}_6)_2$ .  $D = 3.3 \times 10^{-10} \text{ m}^2 \text{ s}^{-1}$  and  $r = 16.1 \text{ \AA}$ .

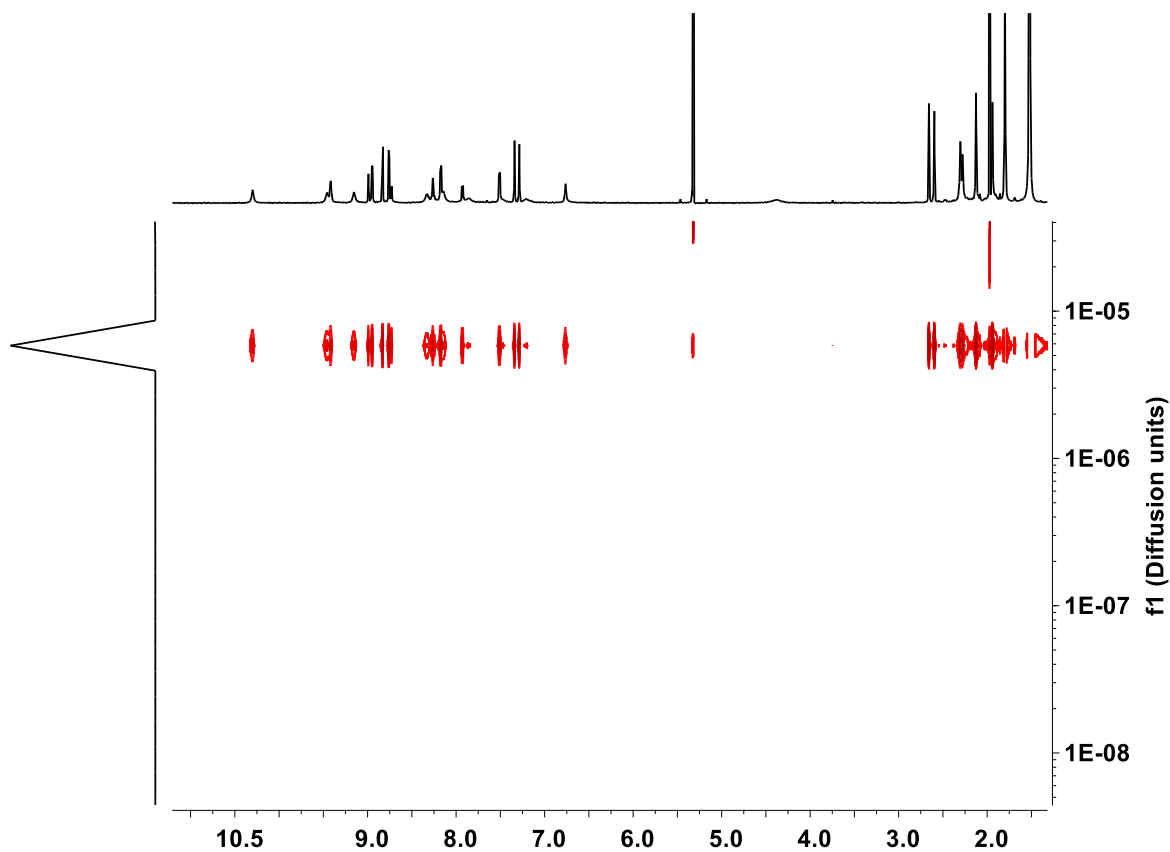

**Figure S18.**  $^1\text{H}$  DOSY NMR (600 MHz,  $\text{CD}_2\text{Cl}_2$ ) of deck  $[\text{Cu}_2(\text{S})(\text{P})_2](\text{PF}_6)_2$ .  $D = 3.9 \times 10^{-10} \text{ m}^2\text{s}^{-1}$ .  $r = 13.6 \text{ \AA}$ .

## 5. Catalysis

### Procedure for the *in-situ* formation of the ZnPor deck P

A mixture of compounds **1** (4.0 mM), **2**, 2,9-dimesityl-1,10-phenanthroline (**Phen**) and  $[\text{Cu}(\text{CH}_3\text{CN})_4]\text{PF}_6$  and standard (trimethoxybenzene, **7**) in 1:1:1:1:1 ratio was heated at 50 °C for 24 h in  $\text{CD}_2\text{Cl}_2:\text{CDCl}_3 = 4:1$  to quantitatively produce complex  $[\text{Cu}(\text{Phen})(\text{P})]\text{PF}_6$ .

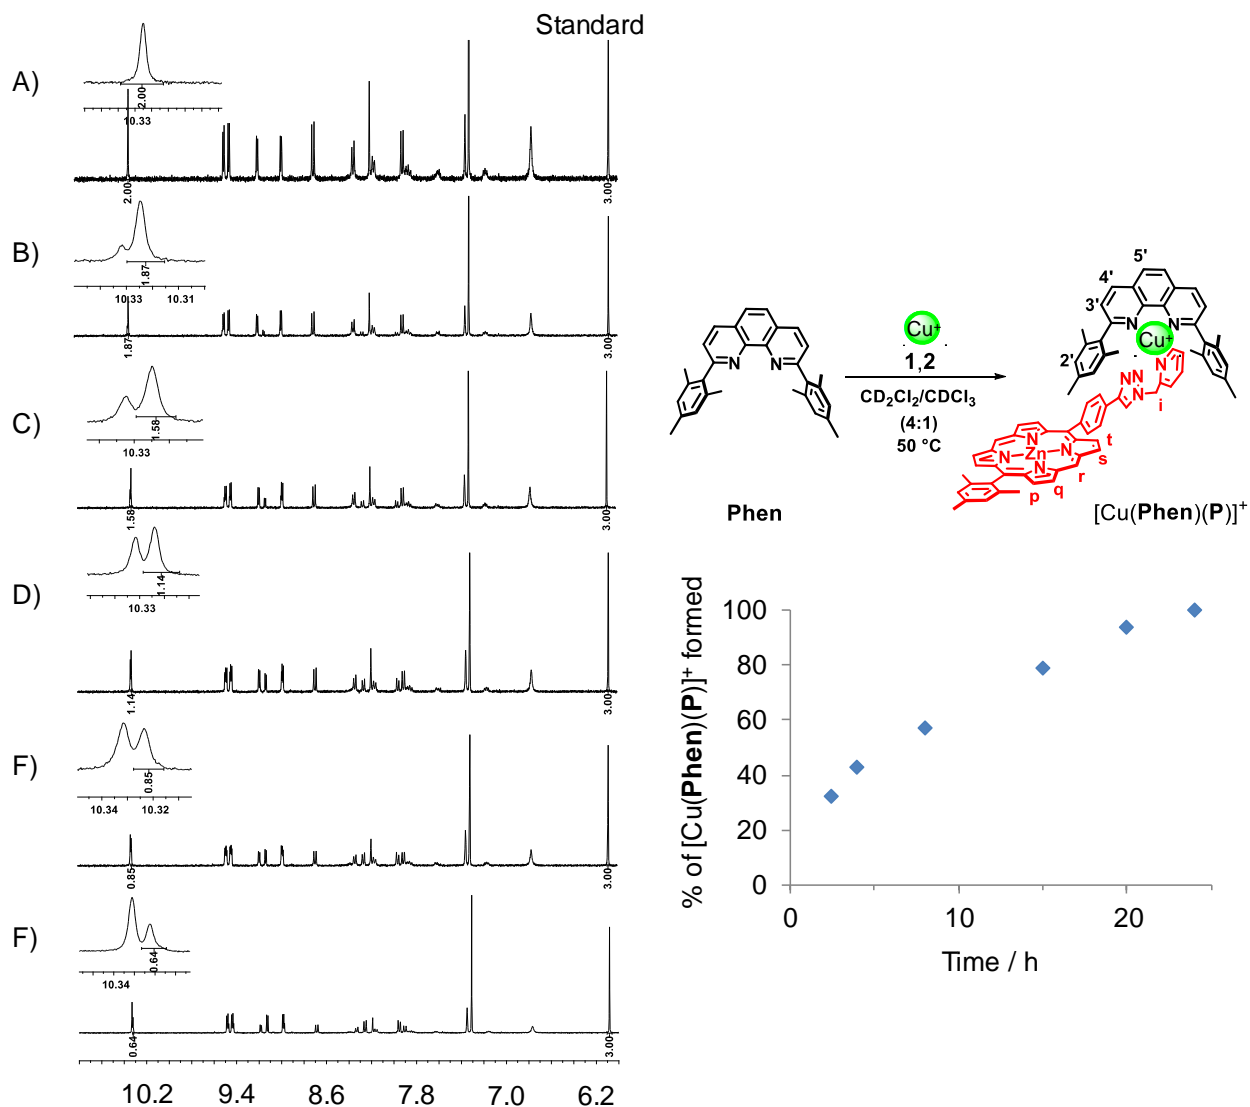

**Figure S19.** (A) <sup>1</sup>H NMR (400 MHz, CD<sub>2</sub>Cl<sub>2</sub>:CDCl<sub>3</sub> = 4:1, 298 K) spectra were recorded with time to monitor the formation of complex [Cu(Phen)(P)]PF<sub>6</sub>. (B) Plot of formation of [Cu(Phen)(P)]PF<sub>6</sub> (%) vs time (h). Quantitative transformation was observed after 24 h.

### Procedure for the *in-situ* formation of the slider-on-deck from the nanorotor

A mixture of compounds **1** (4.0 mM), **2**, **S**, **R**, [Cu(CH<sub>3</sub>CN)<sub>4</sub>]PF<sub>6</sub> and standard (trimethoxybenzene, **7**) in 2:2:1:1:2:10 ratio was heated at 50 °C for 24 h in CD<sub>2</sub>Cl<sub>2</sub>:CDCl<sub>3</sub> = 4:1 to produce the slider-on-deck [Cu<sub>2</sub>(S)(R)(P)<sub>2</sub>](PF<sub>6</sub>)<sub>2</sub>.

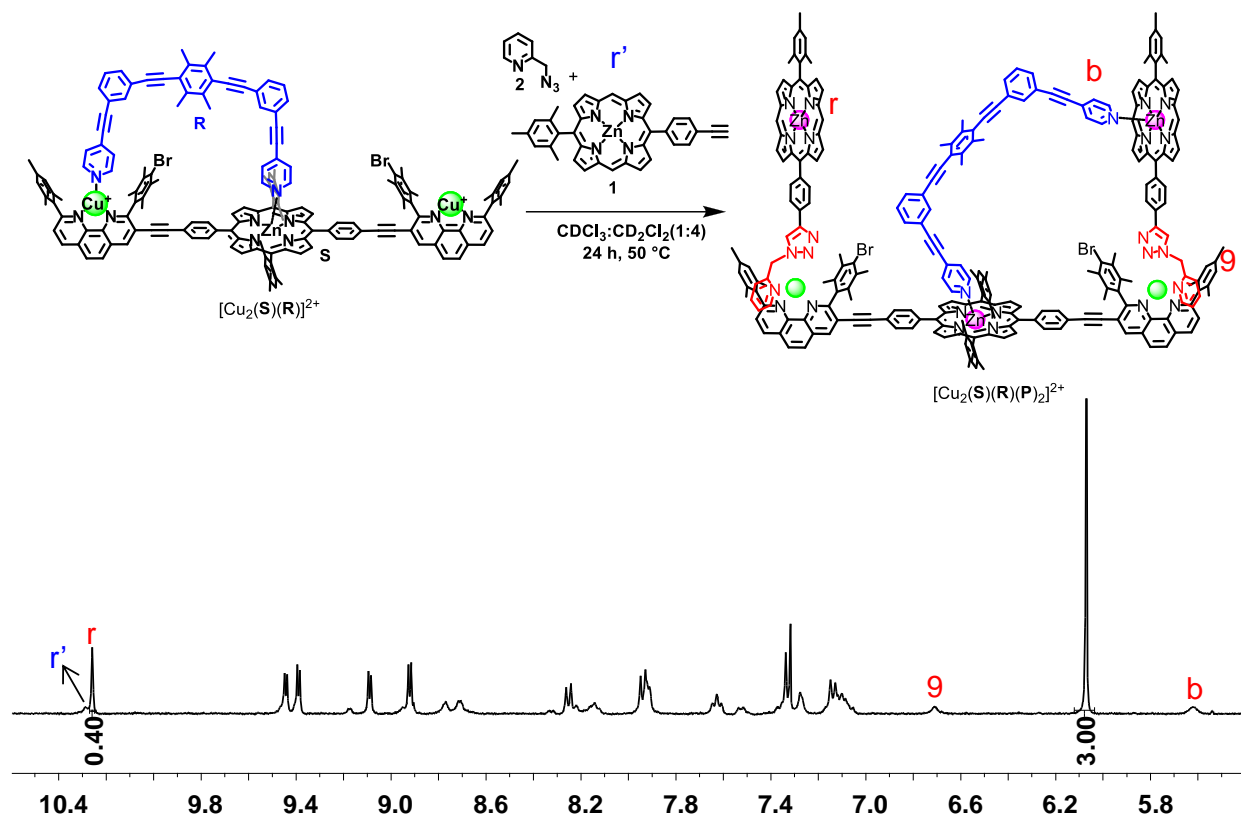

**Figure S20.** A mixture of compounds **1** (4.0 mM), **2**, **S**, **R** and  $[\text{Cu}(\text{CH}_3\text{CN})_4]\text{PF}_6$  and standard (trimethoxybenzene, **7**) in 2:2:1:1:2:10 ratio was heated at  $50^\circ\text{C}$  for 24 h in  $\text{CD}_2\text{Cl}_2:\text{CDCl}_3 = 4:1$  and to produce quantitative slider-on-deck  $[\text{Cu}_2(\text{S})(\text{R})(\text{P})_2](\text{PF}_6)_2$ .

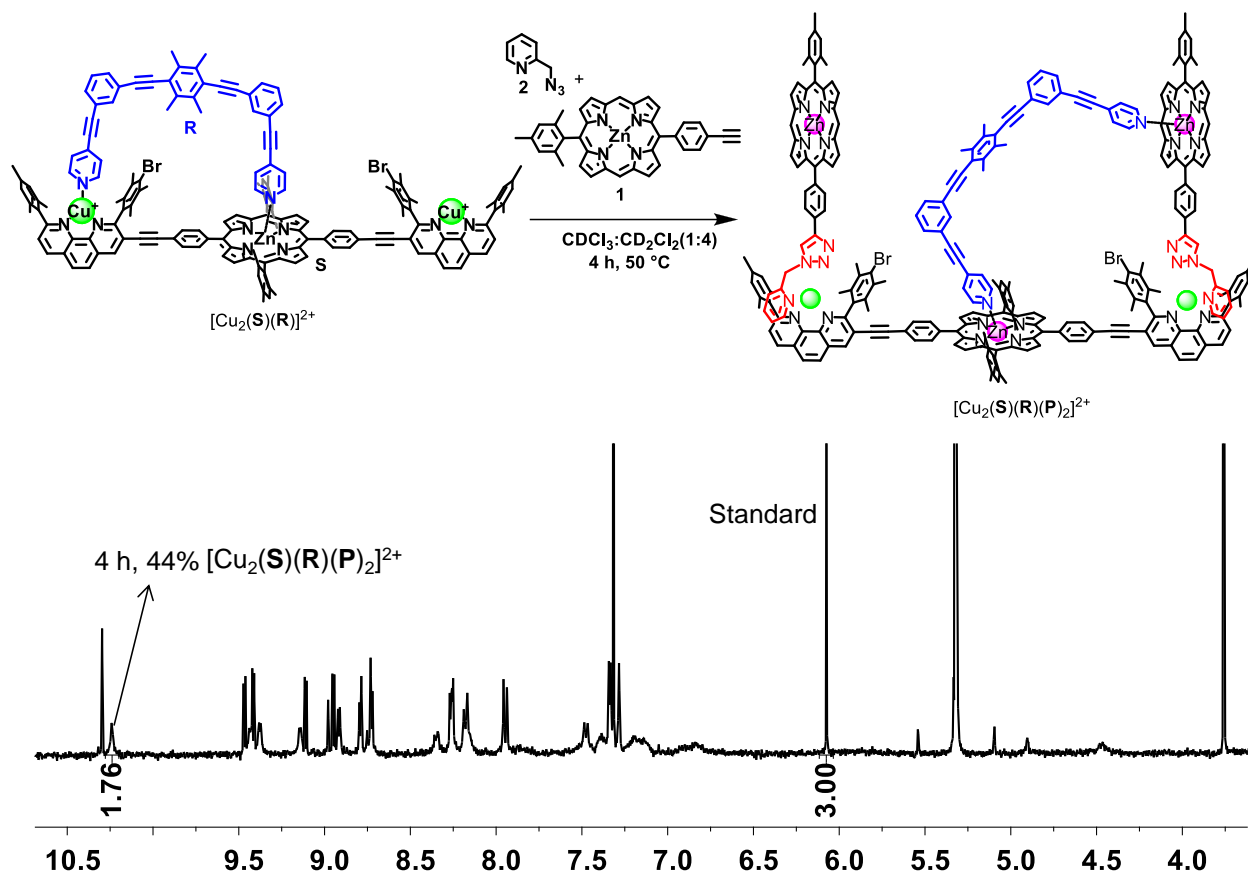

**Figure S21.** <sup>1</sup>H NMR (400 MHz,  $\text{CD}_2\text{Cl}_2:\text{CDCl}_3 = 4:1$ , 298 K) spectrum obtained after heating the reaction mixture of **S** ( $\approx 2.0$  mM), **R**,  $[\text{Cu}(\text{CH}_3\text{CN})_4]\text{PF}_6$ , **1**, **2** and standard (trimethoxybenzene, **7**) in 1:1:2:2:2:2 ratio at  $50^\circ\text{C}$ . After 4 h, product **P** had formed in 88% generating 44% of slider-on-deck  $[\text{Cu}_2(\text{S})(\text{R})(\text{P})_2](\text{PF}_6)_2$ .

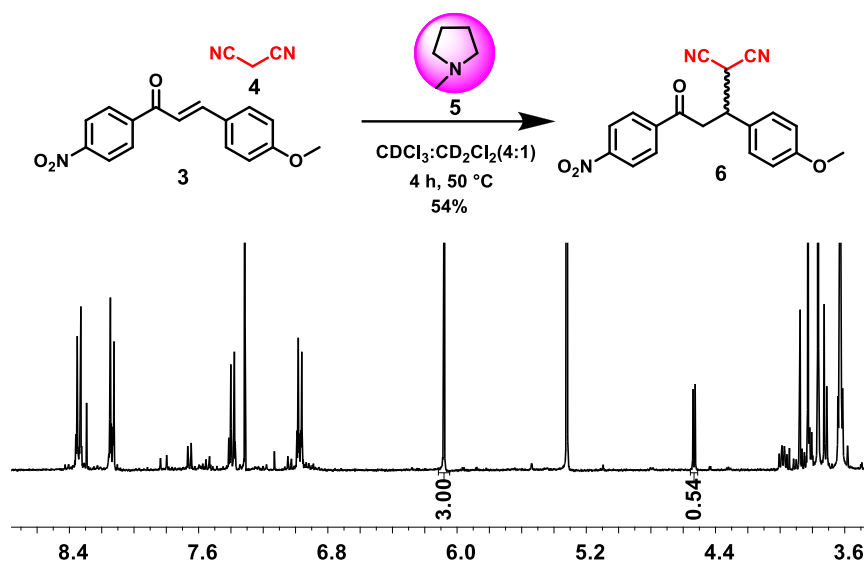

**Figure S22.**  $^1\text{H}$  NMR (400 MHz,  $\text{CD}_2\text{Cl}_2:\text{CDCl}_3 = 4:1$ , 298 K) spectrum obtained after heating the reaction mixture of **3** ( $\approx 40$  mM), **4**, **5** and standard (trimethoxybenzene, **7**) in 10:50:1:10 ratio at 50 °C. Product **6** was furnished after 4 h in 54% yield.

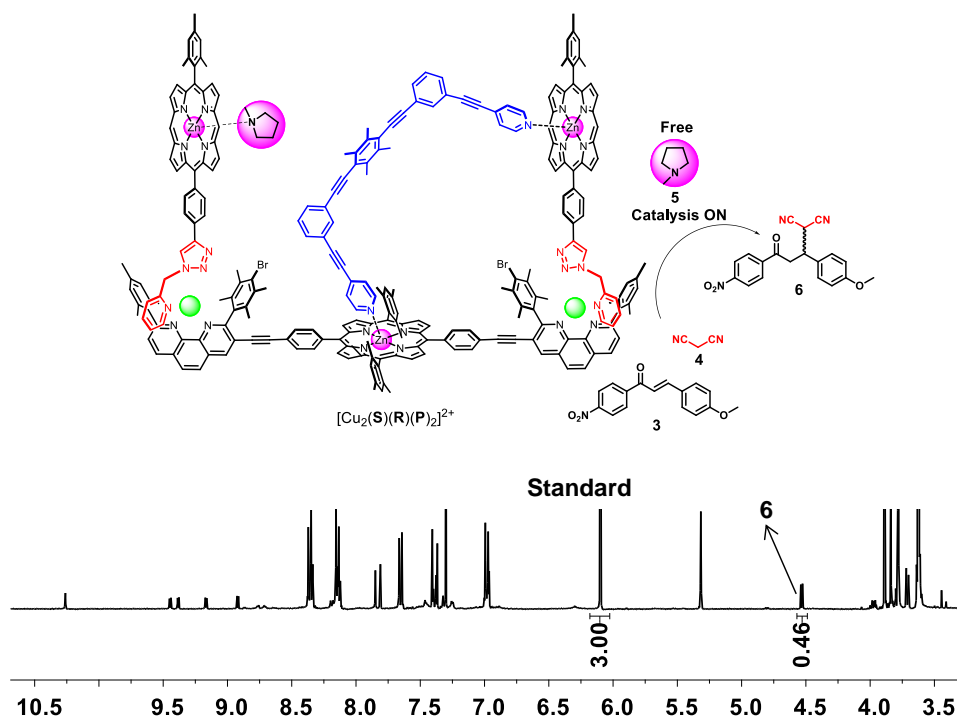

**Figure S23.**  $^1\text{H}$  NMR (400 MHz,  $\text{CD}_2\text{Cl}_2:\text{CDCl}_3 = 4:1$ , 298 K) spectrum obtained after heating the reaction mixture of **S** ( $\approx 2.0$  mM), **R**,  $[\text{Cu}(\text{CH}_3\text{CN})_4]\text{PF}_6$ , **P**, **3** ( $\approx 40$  mM), **4**, **5** and standard (trimethoxybenzene, **7**) in 1:2:2:2:20:100:2:20 ratio at 50 °C. Product **6** was furnished after 4 h in 46% yield.

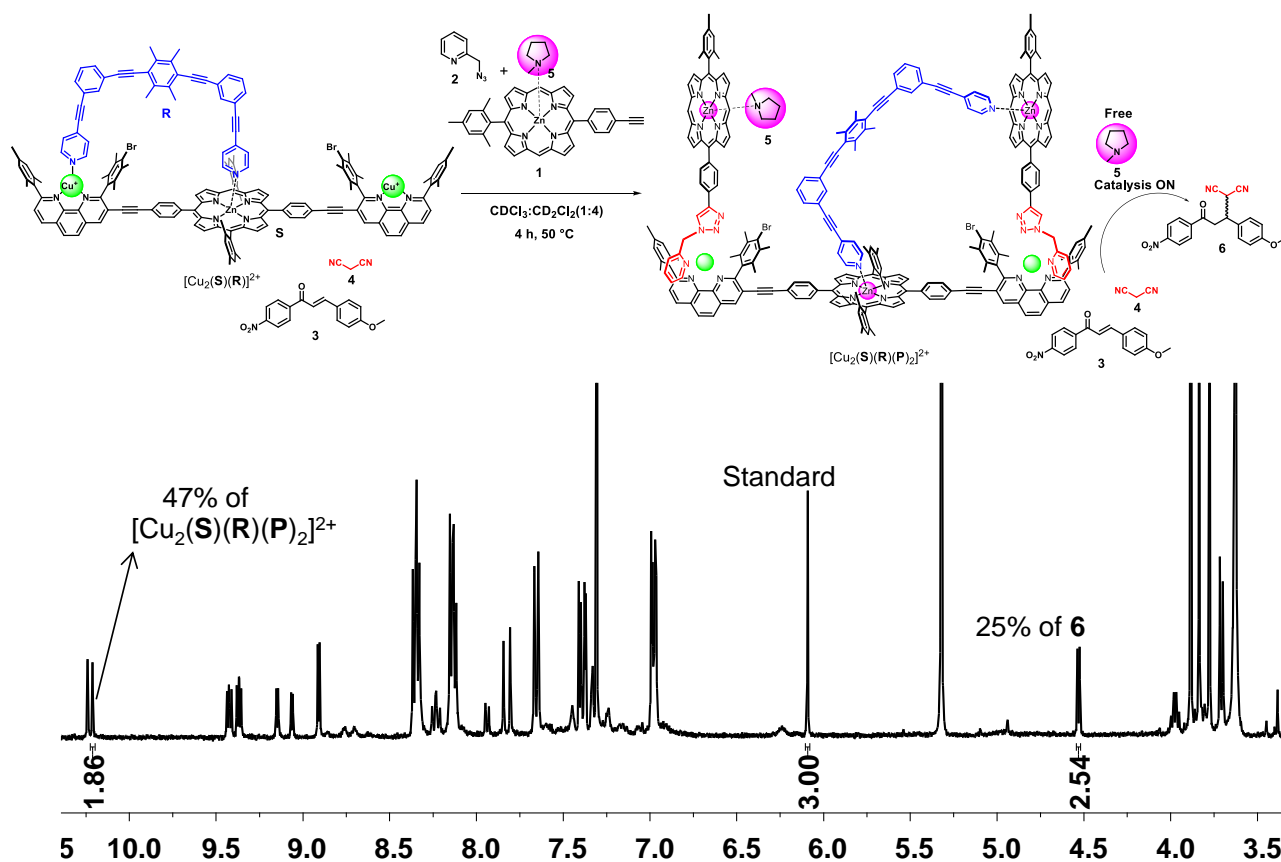

**Figure S24.**  $^1\text{H}$  NMR (400 MHz,  $\text{CD}_2\text{Cl}_2:\text{CDCl}_3 = 4:1$ , 298 K) spectrum obtained after heating the reaction mixture of **S** ( $\approx 2.0$  mM), **R**,  $[\text{Cu}(\text{CH}_3\text{CN})_4]\text{PF}_6$ , **1**, **2**, **3** ( $\approx 40$  mM), **4**, **5** and standard (trimethoxybenzene, **7**) in 1:1:2:2:2:20:100:2:2 ratio at  $50^\circ\text{C}$ . 93% of the product **P** ( $\approx 47\%$  of slider-on-deck  $[\text{Cu}_2(\text{S})(\text{R})(\text{P})_2](\text{PF}_6)_2$  and 25% of the product **6** were furnished after 4 h.



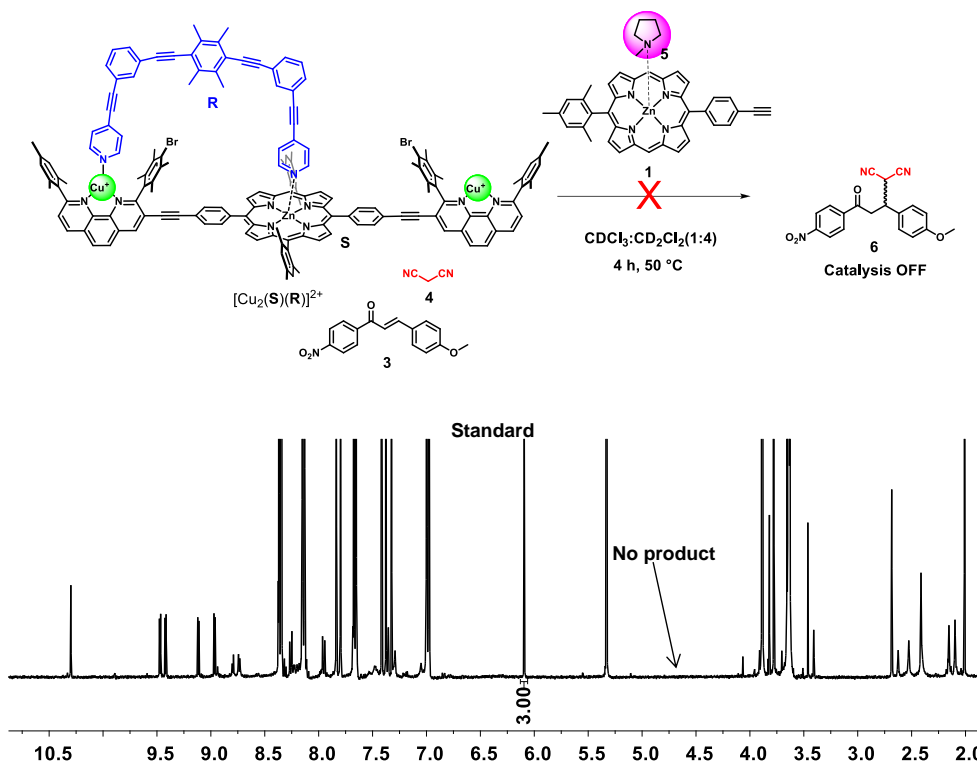

**Figure S25.**  $^1\text{H}$  NMR (400 MHz,  $\text{CD}_2\text{Cl}_2:\text{CDCl}_3 = 4:1$ , 298 K) spectrum obtained after heating the reaction mixture of **S** ( $\approx 2.0$  mM), **R**,  $[\text{Cu}(\text{CH}_3\text{CN})_4]\text{PF}_6$ , **1**, **3** ( $\approx 40$  mM), **4**, **5** and standard (trimethoxybenzene, **7**) in 1:1:2:2:20:100:2:20 ratio at 50 °C. Neither product **P** nor product **6** was furnished after 4 h.

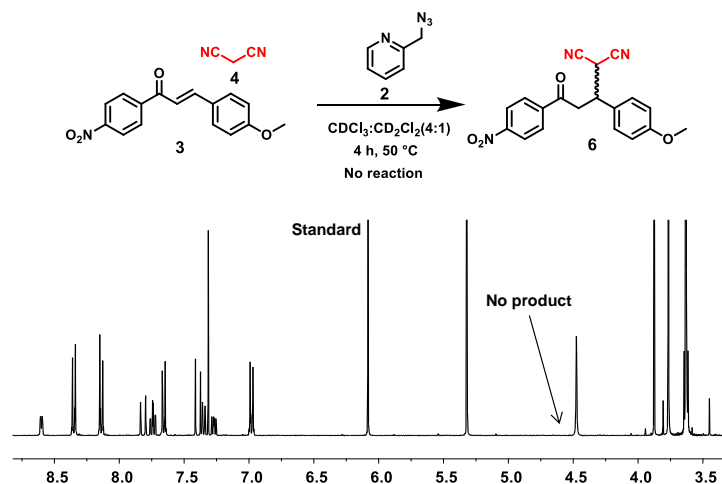

**Figure S26.**  $^1\text{H}$  NMR (400 MHz,  $\text{CD}_2\text{Cl}_2:\text{CDCl}_3 = 4:1$ , 298 K) spectrum obtained after heating the reaction mixture of **3** ( $\approx 40$  mM), **4**, **2** and standard (trimethoxybenzene, **7**) in 10:50:1:10 ratio at 50 °C. No product **6** was furnished after 4 h.

## 6. Variable temperature $^1\text{H}$ NMR

Three possible dynamic structures of slider-on-deck  $[\text{Cu}_2(\text{S})(\text{R})(\text{P})_2](\text{PF}_6)_2$

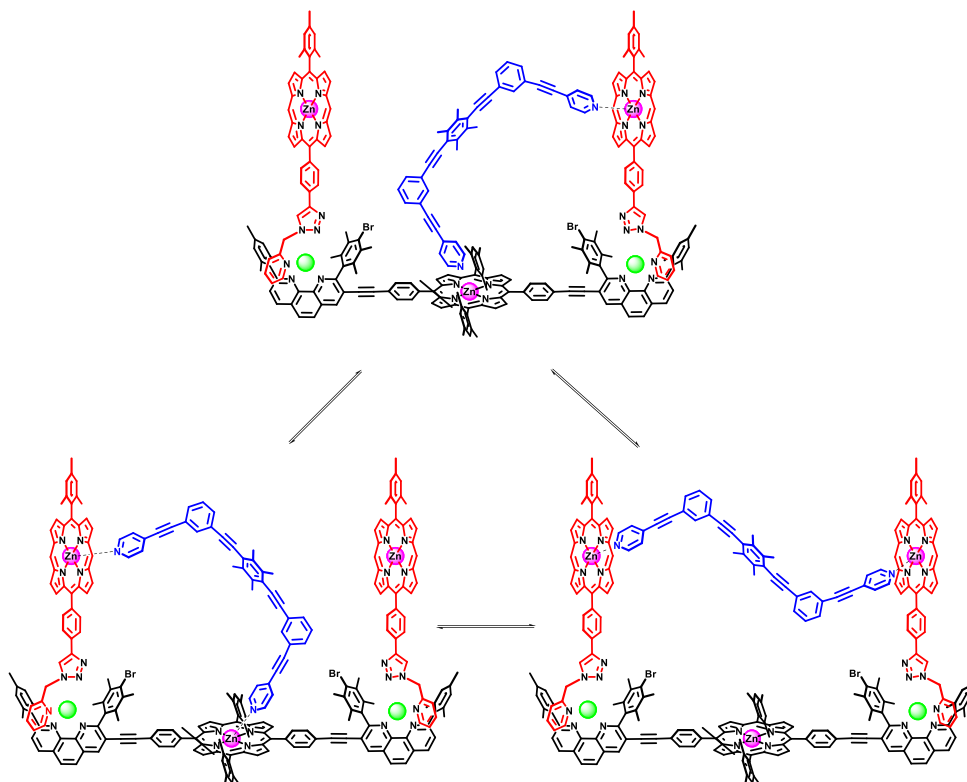

The kinetics of rotation was analyzed at various temperatures using the program WinDNMR<sup>8</sup> through simulation of the experimental  $^1\text{H}$  NMR spectra. The spectral simulation providing rate constants was performed using the model of a 2-spin system with mutual exchange. Activation parameters were determined from an Eyring plot.

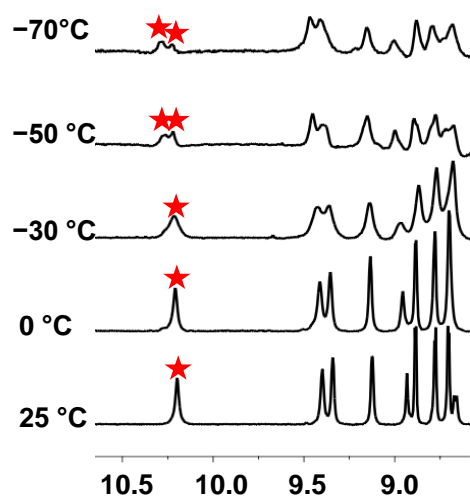

**Figure S27.** Partial  $^1\text{H}$  VT-NMR (600 MHz,  $\text{CD}_2\text{Cl}_2$ ) of  $[\text{Cu}_2(\text{S})(\text{R})(\text{P})_2](\text{PF}_6)_2$  showing splitting of r-H (red asterisk).

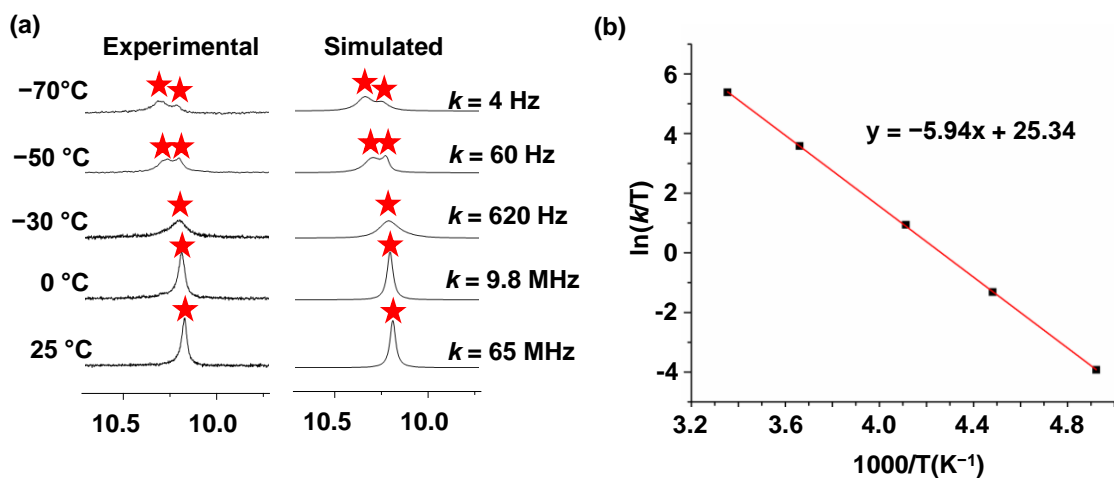

**Figure S28.** (a) Partial  $^1\text{H}$  VT-NMR (600 MHz,  $\text{CD}_2\text{Cl}_2$ ) of  $[\text{Cu}_2(\text{S})(\text{R})(\text{P})_2](\text{PF}_6)_2$  shows the splitting of proton r-H (red asterisk marked). (b) Eyring plot for exchange dynamics in slider-on-deck  $[\text{Cu}_2(\text{S})(\text{R})(\text{P})_2](\text{PF}_6)_2$ . Activation parameters were determined to be  $\Delta G^\ddagger = 45.5 \text{ kJ mol}^{-1}$ ,  $\Delta H^\ddagger = 49.4 \pm 0.2 \text{ kJ mol}^{-1}$  and  $\Delta S^\ddagger = 13.1 \pm 0.8 \text{ J mol}^{-1} \text{ K}^{-1}$ .

## 7. ESI-MS

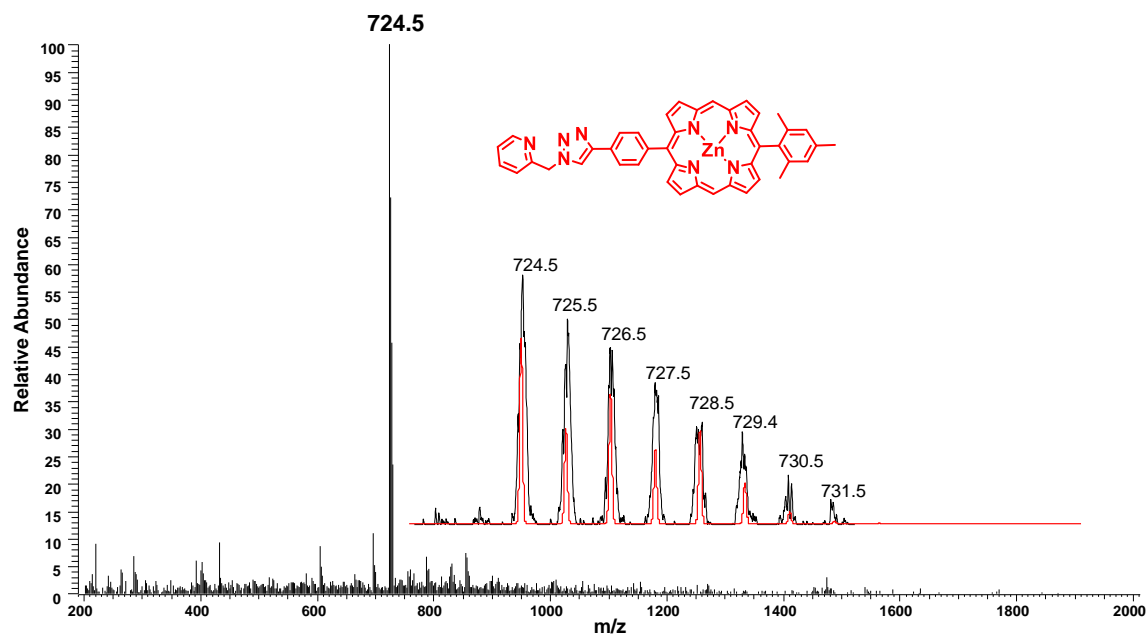

**Figure S29.** ESI-MS spectrum of  $[P + H]^+$  in the presence of  $CH_3CO_2H$  in  $CH_2Cl_2$ .

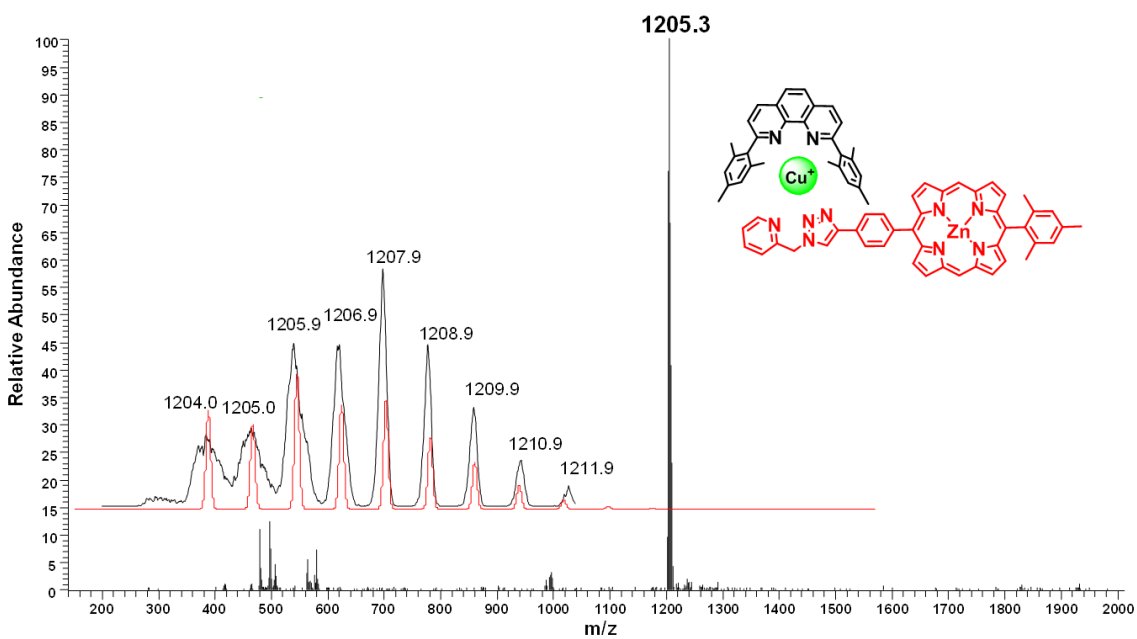

**Figure S30.** ESI-MS spectrum of complex  $[Cu(Phen)(P)]PF_6$  in  $CH_2Cl_2$  along with experimental (black) and calculated (red) isotopic distributions showing species  $[Cu(Phen)(P)]^+$ .

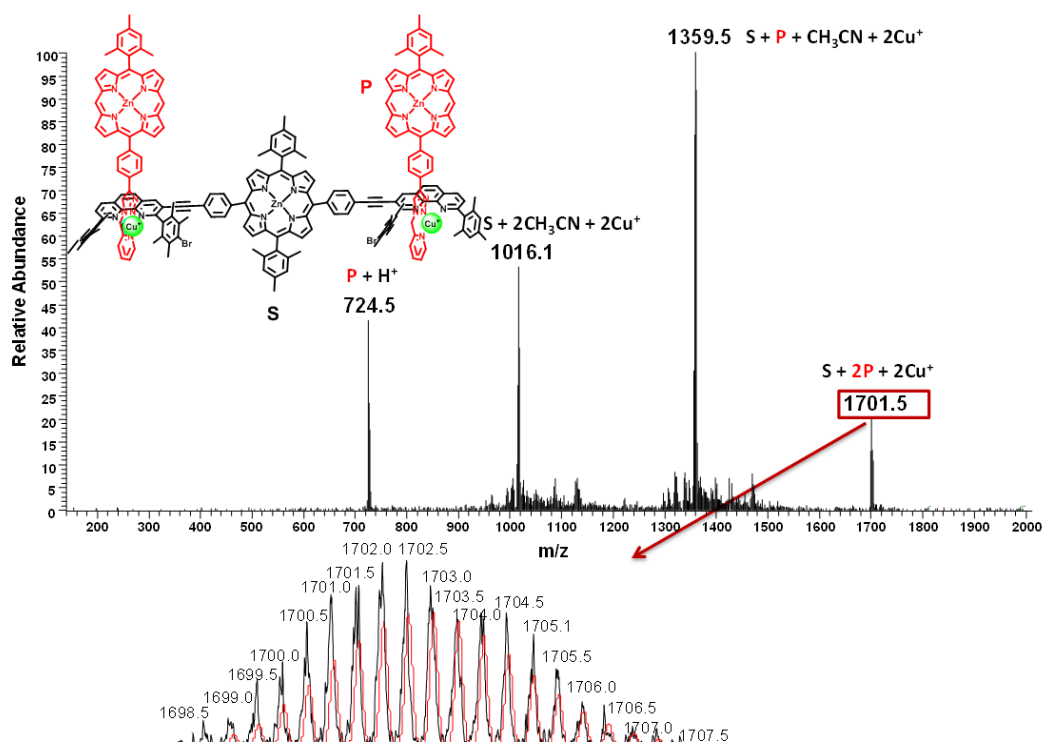

**Figure S31.** ESI-MS spectrum of complex  $[\text{Cu}_2(\text{S})(\text{P})_2](\text{PF}_6)_2$  in  $\text{CH}_2\text{Cl}_2$  along with experimental (black) and calculated (red) isotopic distributions showing species  $[\text{Cu}_2(\text{S})(\text{P})_2]^{2+}$ .

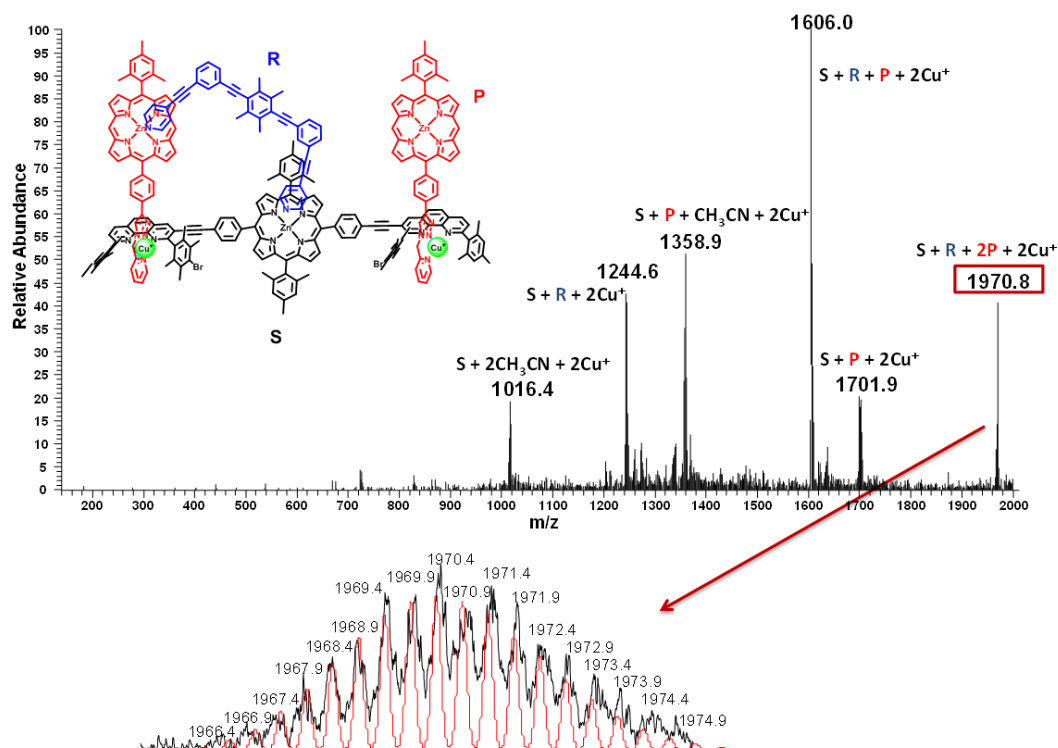

**Figure S32.** ESI-MS spectrum of complex  $[\text{Cu}_2(\text{S})(\text{R})(\text{P})_2](\text{PF}_6)_2$  in  $\text{CH}_2\text{Cl}_2$  along with experimental (black) and calculated (red) isotopic distributions showing species  $[\text{Cu}_2(\text{S})(\text{R})(\text{P})_2]^{2+}$ .

## 8. UV-vis spectra

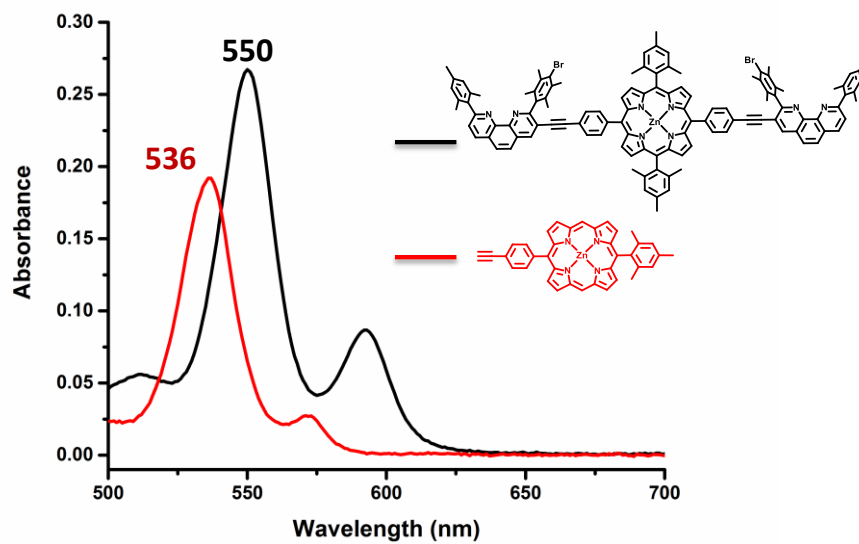

**Figure S33.** Comparison of UV-vis spectra of stator **S** and compound **1** in 1,1,2,2-tetrachloroethane ( $c = 1.00$  mM, 298 K) in 1.0 mm cuvette.

## 9. Estimation of hydrodynamic radius and energy minimized structures

Stokes-Einstein Equation;  $D = kT/6\pi\eta r$

$D$  = diffusion coefficient

$k$  = Boltzmann constant

$T$  = temperature

$\eta$  = viscosity of the solution

$r$  = hydrodynamic radius of the particle

There are two possible slider-on-deck structures, **DS1** and **DS2**, see below.

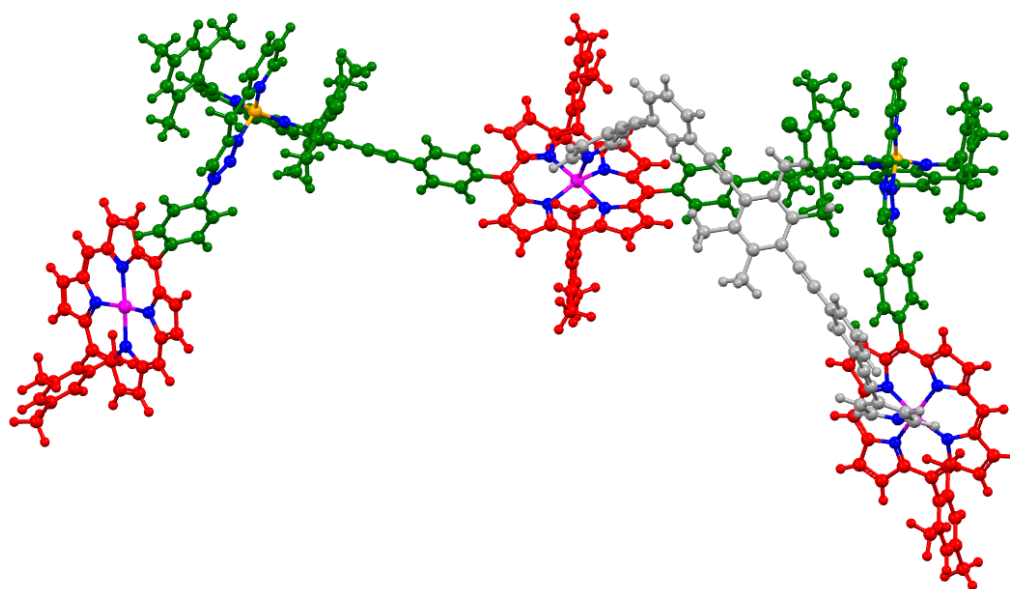

**Figure S34.** DFT-optimized structure of complex slider-on-deck **DS1** =  $[\text{Cu}_2(\text{S})(\text{R})(\text{P})_2](\text{PF}_6)_2$  (bipod coordinated to the inner and one outer ZnPor unit) using B3LYP/6-31G(d) and separately LanL2DZ basis set for copper(I)/zinc(II). Counter anions are not included. Hydrogens are omitted for clarity.

$D = 3.3 \times 10^{-10} \text{ m}^2\text{s}^{-1}$  (from DOSY of the interconverting **DS1**  $\rightleftharpoons$  **DS2**)

The experimental hydrodynamic radius was calculated as

$$r_{\text{H}} = 16.1 \text{ \AA}$$

The radius calculated from the energy minimized structure:

$$r_{\text{H}} = 16.8 \text{ \AA}$$

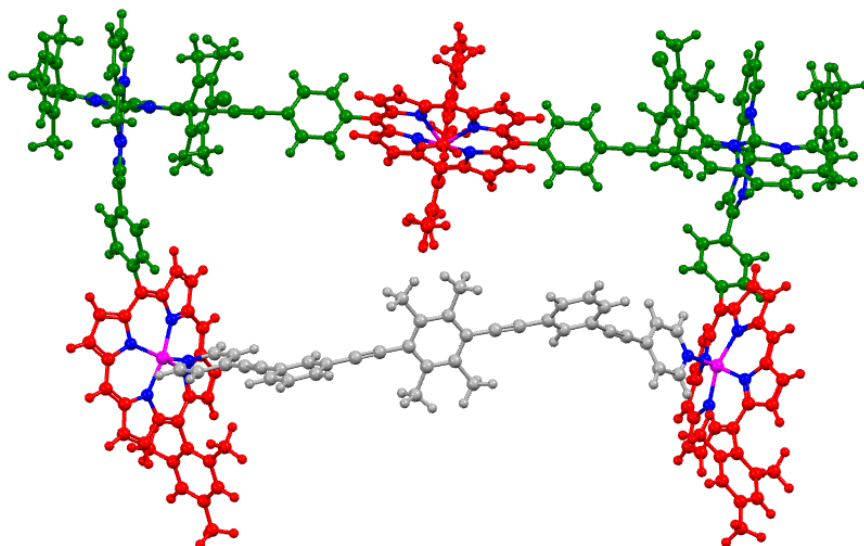

**Figure S35.** DFT-optimized structure of complex slider-on-deck **DS2** = [Cu<sub>2</sub>(S)(R)(P)<sub>2</sub>](PF<sub>6</sub>)<sub>2</sub> (biped coordinated to both peripheral ZnPor units) using B3LYP/6-31G(d) and separately LanL2DZ basis set for copper(I)/zinc(II). Counter anions are not included. Hydrogens are omitted for clarity.

$$D = 3.3 \times 10^{-10} \text{ m}^2\text{s}^{-1} \text{ (from DOSY of the interconverting } \mathbf{DS1} \rightleftharpoons \mathbf{DS2})$$

The experimental hydrodynamic radius was calculated as

$$r_H = 16.1 \text{ \AA}$$

The radius calculated from the energy minimized structure:

$$r = 16.4 \text{ \AA}$$



**Coordinates:**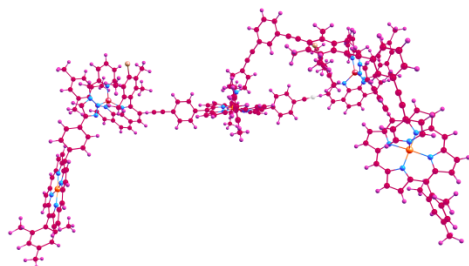**DS1 = [Cu<sub>2</sub>(S)(R)(P)<sub>2</sub>](PF<sub>6</sub>)<sub>2</sub>**

|    |             |             |             |
|----|-------------|-------------|-------------|
| C  | 2.03250000  | -6.25230000 | -8.09870000 |
| C  | 2.27820000  | -4.87260000 | -8.20830000 |
| C  | 1.54920000  | -6.77060000 | -6.88480000 |
| C  | 2.09710000  | -4.01870000 | -7.10430000 |
| H  | 2.61130000  | -4.47740000 | -9.12440000 |
| C  | 1.33090000  | -5.92850000 | -5.77870000 |
| H  | 1.34570000  | -7.79970000 | -6.80640000 |
| C  | 1.61670000  | -4.54940000 | -5.88630000 |
| C  | 1.40780000  | -3.66730000 | -4.71760000 |
| C  | 2.35460000  | -3.55350000 | -3.77810000 |
| C  | 0.18360000  | -2.89370000 | -4.60630000 |
| N  | 2.36130000  | -2.67860000 | -2.65130000 |
| C  | 3.68550000  | -4.13950000 | -3.92330000 |
| N  | -0.21910000 | -2.11310000 | -3.49180000 |
| C  | -0.80110000 | -2.91590000 | -5.52000000 |
| Zn | 0.79990000  | -1.79860000 | -1.84570000 |
| C  | 3.59850000  | -2.59060000 | -2.26930000 |
| C  | 4.45420000  | -3.50930000 | -3.03690000 |
| H  | 4.00220000  | -4.83980000 | -4.63150000 |
| C  | -1.59430000 | -1.82510000 | -3.71760000 |
| C  | -1.94330000 | -2.22970000 | -4.95030000 |
| H  | -0.81030000 | -3.46050000 | -6.41320000 |
| N  | 1.96110000  | -0.79020000 | -0.61770000 |
| N  | -0.73340000 | -0.76690000 | -1.16390000 |
| C  | 4.16230000  | -1.71750000 | -1.24900000 |
| H  | 5.48090000  | -3.66060000 | -2.91000000 |
| C  | -2.55210000 | -1.39890000 | -2.70940000 |
| H  | -2.90800000 | -2.23330000 | -5.35460000 |
| C  | 1.60410000  | -0.03600000 | 0.37870000  |
| C  | 3.38090000  | -0.88120000 | -0.55850000 |
| C  | -0.79540000 | -0.17110000 | 0.12460000  |
| C  | -2.09900000 | -0.93170000 | -1.54040000 |
| C  | 2.77690000  | 0.49600000  | 1.08820000  |
| C  | 0.25210000  | 0.21230000  | 0.86160000  |
| C  | 3.86580000  | -0.00750000 | 0.50760000  |
| C  | -2.19440000 | -0.00200000 | 0.52940000  |
| C  | -2.96880000 | -0.46910000 | -0.45310000 |
| H  | 2.76920000  | 1.14690000  | 1.90670000  |
| C  | 0.05070000  | 0.86480000  | 2.17570000  |
| H  | 4.85760000  | 0.16550000  | 0.78900000  |
| H  | -2.53680000 | 0.40640000  | 1.42950000  |
| H  | -4.01460000 | -0.47470000 | -0.44810000 |
| C  | -0.05250000 | 2.27140000  | 2.25840000  |
| C  | -0.03660000 | 0.08490000  | 3.35010000  |
| C  | -0.22450000 | 2.88460000  | 3.51380000  |
| C  | 0.02480000  | 3.13990000  | 1.02140000  |
| C  | -0.20700000 | 0.71550000  | 4.59640000  |
| C  | 0.06240000  | -1.42250000 | 3.30340000  |
| C  | -0.28340000 | 2.11560000  | 4.68880000  |

|   |              |             |             |
|---|--------------|-------------|-------------|
| H | -0.30470000  | 3.93140000  | 3.57780000  |
| H | 0.99350000   | 3.00770000  | 0.53760000  |
| H | -0.76770000  | 2.86320000  | 0.32480000  |
| H | -0.09330000  | 4.19250000  | 1.28180000  |
| H | -0.27350000  | 0.13490000  | 5.47120000  |
| H | -0.69800000  | -1.82040000 | 2.63070000  |
| H | 1.05260000   | -1.71080000 | 2.94910000  |
| H | -0.09280000  | -1.85230000 | 4.29370000  |
| C | -0.50360000  | 2.77950000  | 6.02610000  |
| H | -1.57350000  | 2.91010000  | 6.19460000  |
| H | -0.08800000  | 2.16480000  | 6.82610000  |
| H | -0.01540000  | 3.75490000  | 6.04640000  |
| C | 2.21260000   | -7.15880000 | -9.29180000 |
| H | 1.25500000   | -7.28700000 | -9.79840000 |
| H | 2.93180000   | -6.72850000 | -9.99010000 |
| H | 2.58070000   | -8.13360000 | -8.96810000 |
| C | 2.37550000   | -2.53980000 | -7.27070000 |
| H | 1.43280000   | -1.99460000 | -7.33310000 |
| H | 2.95270000   | -2.16670000 | -6.42400000 |
| H | 2.94640000   | -2.35820000 | -8.18250000 |
| C | 0.82830000   | -6.52920000 | -4.48310000 |
| H | 1.62680000   | -6.51800000 | -3.73980000 |
| H | -0.02060000  | -5.95500000 | -4.10900000 |
| H | 0.50710000   | -7.56020000 | -4.63690000 |
| C | -3.99080000  | -1.64050000 | -2.92450000 |
| C | -4.58240000  | -2.79860000 | -2.38530000 |
| C | -4.76590000  | -0.76430000 | -3.70560000 |
| C | -5.93610000  | -3.08310000 | -2.62770000 |
| H | -4.01080000  | -3.46270000 | -1.80440000 |
| C | -6.11960000  | -1.05110000 | -3.95210000 |
| H | -4.33210000  | 0.09960000  | -4.11930000 |
| C | -6.70570000  | -2.21360000 | -3.41970000 |
| H | -6.36690000  | -3.95150000 | -2.21970000 |
| H | -6.68990000  | -0.39350000 | -4.54230000 |
| C | 5.61910000   | -1.75480000 | -1.02350000 |
| C | 6.46560000   | -0.90080000 | -1.75410000 |
| C | 6.17700000   | -2.72700000 | -0.17240000 |
| C | 7.86020000   | -1.04420000 | -1.66310000 |
| H | 6.05840000   | -0.18270000 | -2.40520000 |
| C | 7.57190000   | -2.87140000 | -0.08250000 |
| H | 5.55180000   | -3.38110000 | 0.36300000  |
| C | 8.41530000   | -2.04210000 | -0.84240000 |
| H | 8.48410000   | -0.42890000 | -2.24540000 |
| H | 7.97860000   | -3.63000000 | 0.52100000  |
| C | -8.08080000  | -2.50090000 | -3.66390000 |
| C | 9.82130000   | -2.27810000 | -0.86990000 |
| C | -9.24360000  | -2.73400000 | -3.87610000 |
| C | 11.01170000  | -2.45940000 | -0.91390000 |
| H | -10.23550000 | -2.89570000 | -4.06230000 |
| C | -11.26390000 | -3.06140000 | -4.25820000 |
| C | -11.86500000 | -2.49830000 | -5.40480000 |
| C | -12.06570000 | -3.75360000 | -3.32370000 |
| C | -13.25450000 | -2.62390000 | -5.58740000 |
| H | -11.28120000 | -1.96210000 | -6.09480000 |
| C | -13.96500000 | -3.29130000 | -4.57990000 |
| C | -13.97500000 | -2.08570000 | -6.67200000 |
| C | -15.36490000 | -3.40670000 | -4.63600000 |
| C | -15.37890000 | -2.21940000 | -6.73960000 |
| H | -13.46810000 | -1.57370000 | -7.43810000 |
| C | -16.08690000 | -2.88290000 | -5.71790000 |
| H | -15.89770000 | -1.80800000 | -7.55670000 |
| C | -17.48350000 | -3.05070000 | -5.68780000 |

|   |               |              |              |    |               |              |              |
|---|---------------|--------------|--------------|----|---------------|--------------|--------------|
| C | -17.259100000 | -4.187000000 | -3.540400000 | C  | 11.409900000  | -7.081200000 | 2.226500000  |
| C | -18.071200000 | -3.714600000 | -4.592100000 | H  | 12.156500000  | -7.876400000 | 2.214200000  |
| H | -18.085600000 | -2.683600000 | -6.466900000 | H  | 10.768300000  | -7.211000000 | 3.097500000  |
| H | -19.114000000 | -3.842200000 | -4.555100000 | H  | 10.777600000  | -7.165400000 | 1.341600000  |
| H | 12.019100000  | -2.611500000 | -0.999200000 | C  | 12.449200000  | -5.882600000 | -0.257000000 |
| C | 13.062000000  | -2.756600000 | -1.124700000 | H  | 11.460800000  | -5.665700000 | -0.665000000 |
| C | 13.668800000  | -2.374900000 | -2.341000000 | H  | 13.204300000  | -5.576300000 | -0.979900000 |
| C | 13.845700000  | -3.356700000 | -0.113700000 | H  | 12.554000000  | -6.959500000 | -0.121700000 |
| C | 15.035200000  | -2.638300000 | -2.543300000 | C  | 20.525300000  | -3.294100000 | 1.386500000  |
| H | 13.090800000  | -1.937400000 | -3.102300000 | H  | 21.485900000  | -3.264100000 | 0.870200000  |
| C | 15.721700000  | -3.243700000 | -1.482200000 | H  | 19.792200000  | -2.738100000 | 0.803700000  |
| C | 15.735900000  | -2.373100000 | -3.736500000 | H  | 20.630300000  | -2.811700000 | 2.359600000  |
| C | 17.064300000  | -3.635500000 | -1.626000000 | C  | 18.397500000  | -7.604800000 | -0.350000000 |
| C | 17.087800000  | -2.754800000 | -3.875000000 | H  | 17.601800000  | -7.029200000 | -0.821700000 |
| H | 15.246700000  | -1.905000000 | -4.540900000 | H  | 19.135400000  | -7.877400000 | -1.106200000 |
| C | 17.758000000  | -3.410800000 | -2.823600000 | H  | 17.963300000  | -8.515500000 | 0.065200000  |
| H | 17.588700000  | -2.562800000 | -4.779300000 | C  | 20.703200000  | -7.520100000 | 4.122000000  |
| C | 19.083600000  | -3.878700000 | -2.885600000 | H  | 19.996200000  | -8.306100000 | 4.392800000  |
| C | 18.848100000  | -4.723000000 | -0.609000000 | H  | 21.674600000  | -7.969500000 | 3.910400000  |
| C | 19.627400000  | -4.548700000 | -1.771100000 | H  | 20.801200000  | -6.834000000 | 4.964400000  |
| H | 19.660600000  | -3.744100000 | -3.753500000 | C  | -11.439100000 | -2.159700000 | -0.935800000 |
| H | 20.613300000  | -4.911000000 | -1.807500000 | H  | -10.481400000 | -1.652000000 | -1.062200000 |
| N | -15.953900000 | -4.011900000 | -3.620700000 | H  | -12.111700000 | -1.837700000 | -1.729300000 |
| N | -13.366400000 | -3.819600000 | -3.528900000 | H  | -11.882500000 | -1.860800000 | 0.014800000  |
| N | 15.132500000  | -3.543100000 | -0.338600000 | C  | -10.344900000 | -3.557100000 | 1.431200000  |
| N | 17.613700000  | -4.258300000 | -0.599900000 | H  | -9.540900000  | -4.047300000 | 1.980500000  |
| C | 13.252400000  | -3.894000000 | 1.124000000  | H  | -10.008500000 | -2.546200000 | 1.201300000  |
| C | 13.398400000  | -3.210900000 | 2.351600000  | H  | -11.232500000 | -3.506100000 | 2.063400000  |
| C | 12.617000000  | -5.156900000 | 1.070500000  | C  | -10.520700000 | -7.960300000 | -1.060700000 |
| C | 12.917200000  | -3.807000000 | 3.539700000  | H  | -10.014100000 | -8.253900000 | -1.981100000 |
| C | 12.104900000  | -5.731900000 | 2.254700000  | H  | -9.899200000  | -8.283300000 | -0.227000000 |
| C | 12.316900000  | -5.081900000 | 3.487300000  | H  | -11.482200000 | -8.472600000 | -0.998600000 |
| C | 19.362500000  | -5.425600000 | 0.575600000  | C  | -11.459200000 | -6.570800000 | -3.476500000 |
| C | 19.074000000  | -6.798600000 | 0.738900000  | H  | -11.840400000 | -7.572200000 | -3.276900000 |
| C | 20.099000000  | -4.735300000 | 1.562700000  | H  | -12.170500000 | -6.078100000 | -4.137300000 |
| C | 19.512000000  | -7.468200000 | 1.896000000  | H  | -10.500800000 | -6.650400000 | -3.992300000 |
| C | 20.536200000  | -5.426600000 | 2.708400000  | C  | -18.143800000 | -2.642800000 | -1.151200000 |
| C | 20.214200000  | -6.781300000 | 2.900600000  | H  | -17.848800000 | -2.303500000 | -0.157100000 |
| H | 19.315000000  | -8.495100000 | 2.011000000  | H  | -17.450400000 | -2.228000000 | -1.880700000 |
| H | 21.105400000  | -4.922200000 | 3.435300000  | H  | -19.146500000 | -2.271400000 | -1.368400000 |
| C | -11.496300000 | -4.405700000 | -2.132400000 | C  | -17.768200000 | -7.071600000 | -3.674200000 |
| C | -11.264000000 | -5.799500000 | -2.179100000 | H  | -16.912400000 | -6.689100000 | -4.229600000 |
| C | -11.219000000 | -3.662600000 | -0.963700000 | H  | -17.584700000 | -8.120900000 | -3.439000000 |
| C | -10.747800000 | -6.459100000 | -1.042000000 | H  | -18.659400000 | -6.999300000 | -4.299800000 |
| C | -10.672000000 | -4.320900000 | 0.161100000  | C  | -19.283800000 | -6.976000000 | 1.126400000  |
| C | -10.488900000 | -5.719300000 | 0.129700000  | H  | -18.986600000 | -6.461500000 | 2.041400000  |
| C | -17.823100000 | -4.874900000 | -2.369400000 | H  | -20.372900000 | -7.008600000 | 1.070900000  |
| C | -18.152300000 | -4.155000000 | -1.199900000 | H  | -18.896200000 | -7.995400000 | 1.157300000  |
| C | -17.985700000 | -6.277200000 | -2.403900000 | B  | 11.833800000  | -5.849100000 | 4.935600000  |
| C | -18.620300000 | -4.848600000 | -0.068100000 | B  | -9.917900000  | -6.528100000 | 1.521300000  |
| C | -18.456800000 | -6.951100000 | -1.262200000 | Cu | 16.424500000  | -4.186900000 | 0.796800000  |
| C | -18.741200000 | -6.248600000 | -0.079000000 | Cu | -14.665500000 | -4.401400000 | -2.370200000 |
| H | -18.890000000 | -4.312300000 | 0.796000000  | N  | -14.617500000 | -6.068100000 | -1.600000000 |
| H | -18.600900000 | -7.992700000 | -1.293700000 | C  | -14.666300000 | -6.186200000 | -0.272800000 |
| C | 13.991200000  | -1.813500000 | 2.393600000  | C  | -14.591000000 | -7.102300000 | -2.422400000 |
| H | 14.491100000  | -1.556400000 | 1.461600000  | C  | -14.696400000 | -7.482600000 | 0.283400000  |
| H | 13.192100000  | -1.090300000 | 2.564700000  | C  | -14.724600000 | -5.038600000 | 0.745000000  |
| H | 14.719600000  | -1.738600000 | 3.201300000  | C  | -14.617400000 | -8.417600000 | -1.936100000 |
| C | 13.108600000  | -3.130100000 | 4.884800000  | H  | -14.563300000 | -6.932900000 | -3.459000000 |
| H | 12.994700000  | -2.050000000 | 4.794900000  | C  | -14.673900000 | -8.611100000 | -0.549600000 |
| H | 12.367800000  | -3.476300000 | 5.605400000  | H  | -14.745000000 | -7.613200000 | 1.325700000  |
| H | 14.105700000  | -3.356800000 | 5.265000000  | H  | -15.663800000 | -5.139800000 | 1.297400000  |

|    |               |              |              |    |               |              |              |
|----|---------------|--------------|--------------|----|---------------|--------------|--------------|
| H  | -13.903500000 | -5.191600000 | 1.452300000  | H  | -18.750100000 | 13.322300000 | -4.306300000 |
| N  | -14.635600000 | -3.658500000 | 0.296700000  | H  | -17.013800000 | 10.559000000 | -3.495200000 |
| H  | -14.604000000 | -9.235200000 | -2.594700000 | H  | -18.670900000 | 10.011500000 | -3.145800000 |
| H  | -14.702300000 | -9.579200000 | -0.143400000 | H  | -18.355600000 | 11.046700000 | -4.545500000 |
| C  | -14.802000000 | -2.487800000 | 1.076400000  | H  | -18.815800000 | 15.252400000 | -0.527400000 |
| N  | -14.740600000 | -3.246900000 | -0.977400000 | H  | -18.970800000 | 12.619800000 | 1.481900000  |
| C  | -14.965200000 | -1.484100000 | 0.197900000  | H  | -17.200600000 | 12.664500000 | 1.305700000  |
| H  | -14.848400000 | -2.429000000 | 2.119000000  | H  | -18.116000000 | 14.174000000 | 1.434600000  |
| N  | -14.908300000 | -2.036100000 | -1.098300000 | C  | -19.216700000 | 15.736600000 | -3.170200000 |
| C  | -15.271400000 | -0.066700000 | 0.388600000  | H  | -19.781900000 | 15.543000000 | -4.083400000 |
| C  | -14.909100000 | 0.669500000  | 1.531900000  | H  | -19.826700000 | 16.350900000 | -2.506500000 |
| C  | -15.912400000 | 0.585300000  | -0.681800000 | H  | -18.304100000 | 16.278300000 | -3.422900000 |
| C  | -15.165800000 | 2.052800000  | 1.586800000  | N  | 16.117200000  | -5.661900000 | 1.847300000  |
| H  | -14.420600000 | 0.199000000  | 2.335100000  | C  | 16.447900000  | -5.633100000 | 3.138000000  |
| C  | -16.175000000 | 1.958300000  | -0.626900000 | C  | 15.571100000  | -6.711900000 | 1.258900000  |
| H  | -16.193300000 | 0.054400000  | -1.544400000 | C  | 16.210700000  | -6.785700000 | 3.916600000  |
| C  | -15.787800000 | 2.697900000  | 0.501300000  | C  | 17.100500000  | -4.461600000 | 3.883700000  |
| H  | -14.878000000 | 2.604300000  | 2.434600000  | C  | 15.301000000  | -7.886700000 | 1.975900000  |
| H  | -16.645200000 | 2.431700000  | -1.439600000 | H  | 15.338800000  | -6.663800000 | 0.235700000  |
| C  | -16.058200000 | 4.141300000  | 0.481400000  | C  | 15.629200000  | -7.923400000 | 3.337600000  |
| C  | -15.192300000 | 4.985600000  | -0.091100000 | H  | 16.467800000  | -6.801300000 | 4.936200000  |
| C  | -17.369200000 | 4.618800000  | 0.866700000  | H  | 16.509900000  | -4.284700000 | 4.787900000  |
| N  | -15.327300000 | 6.400500000  | -0.266000000 | H  | 18.095800000  | -4.786600000 | 4.198700000  |
| C  | -13.877000000 | 4.570800000  | -0.581700000 | N  | 17.249500000  | -3.171200000 | 3.231100000  |
| N  | -17.905600000 | 5.886300000  | 0.517000000  | H  | 14.866800000  | -8.717800000 | 1.503400000  |
| C  | -18.300500000 | 3.860300000  | 1.469000000  | H  | 15.447400000  | -8.784400000 | 3.910600000  |
| Zn | -16.846800000 | 7.537100000  | 0.309900000  | C  | 17.858200000  | -2.004000000 | 3.747600000  |
| C  | -14.175000000 | 6.802400000  | -0.712300000 | N  | 17.011100000  | -2.904100000 | 1.936600000  |
| C  | -13.256100000 | 5.687900000  | -0.957700000 | C  | 17.890400000  | -1.127000000 | 2.729800000  |
| H  | -13.483700000 | 3.602800000  | -0.611600000 | H  | 18.245200000  | -1.870900000 | 4.709200000  |
| C  | -19.261700000 | 5.815000000  | 0.937700000  | N  | 17.347800000  | -1.770400000 | 1.594700000  |
| C  | -19.525000000 | 4.632500000  | 1.512200000  | C  | 18.508400000  | 0.196500000  | 2.623100000  |
| H  | -18.195200000 | 2.867400000  | 1.780300000  | C  | 18.007200000  | 1.071700000  | 1.641200000  |
| N  | -15.889100000 | 9.137900000  | -0.309200000 | C  | 19.682500000  | 0.540600000  | 3.318600000  |
| N  | -18.532200000 | 8.555700000  | 0.247100000  | C  | 18.698400000  | 2.246600000  | 1.313000000  |
| C  | -13.703100000 | 8.162800000  | -0.860600000 | H  | 17.139000000  | 0.823900000  | 1.101800000  |
| H  | -12.284500000 | 5.754800000  | -1.338900000 | C  | 20.377500000  | 1.719100000  | 2.989800000  |
| C  | -20.252000000 | 6.846500000  | 0.758900000  | H  | 20.087900000  | -0.114900000 | 4.033400000  |
| H  | -20.444100000 | 4.313200000  | 1.895200000  | C  | 19.904900000  | 2.558100000  | 1.962900000  |
| C  | -16.358100000 | 10.317300000 | -0.578500000 | H  | 18.339800000  | 2.860000000  | 0.537700000  |
| C  | -14.507300000 | 9.197300000  | -0.623200000 | H  | 21.286200000  | 1.937400000  | 3.471900000  |
| C  | -18.709900000 | 9.892100000  | -0.203100000 | C  | 20.696600000  | 3.696200000  | 1.460300000  |
| C  | -19.863100000 | 8.077800000  | 0.429200000  | C  | 21.695000000  | 3.482300000  | 0.594200000  |
| H  | -12.717200000 | 8.335300000  | -1.185200000 | C  | 20.325700000  | 5.054000000  | 1.810800000  |
| H  | -21.273700000 | 6.622700000  | 0.869300000  | N  | 22.517600000  | 4.448600000  | -0.065900000 |
| C  | -15.277400000 | 11.251400000 | -0.939500000 | C  | 22.149100000  | 2.142900000  | 0.209300000  |
| C  | -17.751000000 | 10.731900000 | -0.604800000 | N  | 20.868300000  | 6.245900000  | 1.259000000  |
| C  | -14.131000000 | 10.570600000 | -0.929200000 | C  | 19.356700000  | 5.360300000  | 2.690400000  |
| C  | -20.142200000 | 10.219800000 | -0.236200000 | Zn | 22.269900000  | 6.406300000  | -0.106600000 |
| C  | -20.826500000 | 9.143900000  | 0.158900000  | C  | 23.410500000  | 3.766200000  | -0.715200000 |
| H  | -15.380700000 | 12.267600000 | -1.163900000 | C  | 23.218200000  | 2.322200000  | -0.564900000 |
| C  | -18.113400000 | 12.016500000 | -1.243200000 | H  | 21.744500000  | 1.223600000  | 0.498900000  |
| H  | -13.180400000 | 10.933000000 | -1.168100000 | C  | 20.092700000  | 7.295400000  | 1.817400000  |
| H  | -20.565000000 | 11.134600000 | -0.516800000 | C  | 19.204200000  | 6.801800000  | 2.692400000  |
| H  | -21.867800000 | 9.071100000  | 0.228600000  | H  | 18.767900000  | 4.687000000  | 3.232600000  |
| C  | -18.282400000 | 12.065300000 | -2.645800000 | N  | 23.886400000  | 6.627000000  | -1.207700000 |
| C  | -18.293100000 | 13.183100000 | -0.469000000 | N  | 22.086500000  | 8.363400000  | -0.038800000 |
| C  | -18.637300000 | 13.279600000 | -3.261200000 | C  | 24.486300000  | 4.260300000  | -1.545600000 |
| C  | -18.067200000 | 10.842300000 | -3.513400000 | H  | 23.793400000  | 1.568400000  | -1.006400000 |
| C  | -18.670500000 | 14.383000000 | -1.101500000 | C  | 20.168900000  | 8.697600000  | 1.483900000  |
| C  | -18.134400000 | 13.159200000 | 1.035200000  | H  | 18.489400000  | 7.344600000  | 3.229200000  |
| C  | -18.857900000 | 14.436000000 | -2.493900000 | C  | 24.412500000  | 7.719700000  | -1.671900000 |

|   |               |              |              |
|---|---------------|--------------|--------------|
| C | 24.673300000  | 5.565800000  | -1.725400000 |
| C | 22.851100000  | 9.323700000  | -0.752400000 |
| C | 21.090300000  | 9.130800000  | 0.624200000  |
| H | 25.141900000  | 3.575400000  | -2.002200000 |
| H | 19.499300000  | 9.378700000  | 1.924700000  |
| C | 25.594800000  | 7.430400000  | -2.502100000 |
| C | 23.935800000  | 9.082900000  | -1.495000000 |
| C | 25.752100000  | 6.107400000  | -2.540400000 |
| C | 22.288800000  | 10.663200000 | -0.532400000 |
| C | 21.234800000  | 10.545300000 | 0.279600000  |
| H | 26.201200000  | 8.129100000  | -2.989900000 |
| C | 24.671300000  | 10.199500000 | -2.127500000 |
| H | 26.492400000  | 5.575200000  | -3.051400000 |
| H | 22.640400000  | 11.559900000 | -0.940700000 |
| H | 20.630100000  | 11.329800000 | 0.616200000  |
| C | 24.339200000  | 10.622700000 | -3.433400000 |
| C | 25.710800000  | 10.842000000 | -1.419000000 |
| C | 25.046500000  | 11.690300000 | -4.017400000 |
| C | 23.225600000  | 9.959900000  | -4.214800000 |
| C | 26.404400000  | 11.909200000 | -2.019200000 |
| C | 26.082300000  | 10.420200000 | -0.013500000 |
| C | 26.091000000  | 12.326600000 | -3.324100000 |
| H | 24.794300000  | 12.017200000 | -4.984800000 |
| H | 23.430800000  | 8.893800000  | -4.320100000 |
| H | 22.277700000  | 10.095400000 | -3.692400000 |
| H | 23.140800000  | 10.397100000 | -5.210600000 |
| H | 27.168600000  | 12.399900000 | -1.488400000 |
| H | 25.244500000  | 10.606400000 | 0.659900000  |
| H | 26.329100000  | 9.357800000  | 0.002200000  |
| H | 26.947300000  | 10.982000000 | 0.341400000  |
| C | 26.814200000  | 13.498500000 | -3.941500000 |
| H | 26.290200000  | 14.421600000 | -3.689800000 |
| H | 27.836200000  | 13.552400000 | -3.563000000 |
| H | 26.849500000  | 13.390600000 | -5.026600000 |
| N | 0.217700000   | -3.297100000 | -0.739400000 |
| C | 0.777000000   | -3.485300000 | 0.447500000  |
| C | -0.834800000  | -4.009200000 | -1.116600000 |
| C | 0.198300000   | -4.341900000 | 1.401100000  |
| H | 1.624500000   | -2.931000000 | 0.723100000  |
| C | -1.490700000  | -4.874200000 | -0.226800000 |
| H | -1.252900000  | -3.877000000 | -2.067800000 |
| C | -0.994800000  | -5.006900000 | 1.078400000  |
| H | 0.605000000   | -4.406800000 | 2.368000000  |
| H | -2.383100000  | -5.349000000 | -0.514700000 |
| C | -1.799100000  | -5.631000000 | 2.077100000  |
| C | -2.564900000  | -6.110700000 | 2.875200000  |
| C | -3.542800000  | -6.579500000 | 3.803300000  |
| C | -3.426500000  | -7.831100000 | 4.432000000  |
| C | -4.647100000  | -5.755300000 | 4.085200000  |
| C | -4.416100000  | -8.252500000 | 5.337600000  |
| H | -2.603800000  | -8.453600000 | 4.229300000  |
| C | -5.637700000  | -6.175100000 | 4.989800000  |
| H | -4.730700000  | -4.815600000 | 3.618400000  |
| C | -5.520300000  | -7.427800000 | 5.617200000  |
| H | -4.327900000  | -9.187000000 | 5.811200000  |
| C | -6.730600000  | -5.303400000 | 5.276500000  |
| H | -6.251000000  | -7.748800000 | 6.301800000  |
| C | -7.631800000  | -4.532600000 | 5.493700000  |
| C | -8.665800000  | -3.575800000 | 5.762900000  |
| C | -10.018000000 | -3.910600000 | 5.529400000  |
| C | -8.308900000  | -2.300800000 | 6.254900000  |
| C | -11.022000000 | -2.931700000 | 5.714400000  |

|   |               |              |              |
|---|---------------|--------------|--------------|
| C | -10.374900000 | -5.305500000 | 5.045300000  |
| C | -9.315600000  | -1.331500000 | 6.465200000  |
| C | -6.851100000  | -1.960900000 | 6.526100000  |
| C | -10.668100000 | -1.671900000 | 6.244700000  |
| C | -12.477400000 | -3.245500000 | 5.409000000  |
| H | -10.371900000 | -5.322100000 | 3.957100000  |
| H | -9.659200000  | -6.040100000 | 5.415900000  |
| H | -11.360000000 | -5.602100000 | 5.405400000  |
| C | -8.964000000  | 0.046300000  | 7.004100000  |
| H | -6.248100000  | -2.858100000 | 6.660700000  |
| H | -6.449300000  | -1.388500000 | 5.688400000  |
| H | -6.762600000  | -1.373900000 | 7.441300000  |
| C | -11.683500000 | -0.747800000 | 6.659300000  |
| H | -12.920500000 | -3.782400000 | 6.248500000  |
| H | -13.045800000 | -2.332200000 | 5.230600000  |
| H | -12.553400000 | -3.855500000 | 4.507400000  |
| H | -9.693900000  | 0.788400000  | 6.679100000  |
| H | -8.946600000  | 0.016800000  | 8.094500000  |
| H | -7.990700000  | 0.371300000  | 6.636400000  |
| C | -12.515600000 | 0.051700000  | 7.007400000  |
| C | -13.510300000 | 0.981600000  | 7.434200000  |
| C | -13.822300000 | 2.110300000  | 6.655300000  |
| C | -14.149200000 | 0.790700000  | 8.672500000  |
| C | -14.772500000 | 3.043700000  | 7.110800000  |
| H | -13.347700000 | 2.253700000  | 5.727000000  |
| C | -15.096500000 | 1.722400000  | 9.128700000  |
| H | -13.917400000 | -0.046800000 | 9.265000000  |
| C | -15.409300000 | 2.848500000  | 8.348800000  |
| C | -15.131200000 | 4.149200000  | 6.283100000  |
| H | -15.573500000 | 1.575600000  | 10.054400000 |
| H | -16.127400000 | 3.536100000  | 8.691000000  |
| C | -15.404000000 | 5.056800000  | 5.538200000  |
| C | -15.687000000 | 6.054400000  | 4.558500000  |
| C | -17.005800000 | 6.457000000  | 4.297400000  |
| C | -14.683300000 | 6.479500000  | 3.675900000  |
| C | -17.283100000 | 7.127100000  | 3.093000000  |
| H | -17.793000000 | 6.162800000  | 4.928900000  |
| C | -15.058100000 | 7.147000000  | 2.498400000  |
| H | -13.679800000 | 6.206400000  | 3.829100000  |
| H | -18.284800000 | 7.333200000  | 2.858700000  |
| N | -16.333900000 | 7.341300000  | 2.191700000  |
| H | -14.305400000 | 7.374900000  | 1.806400000  |

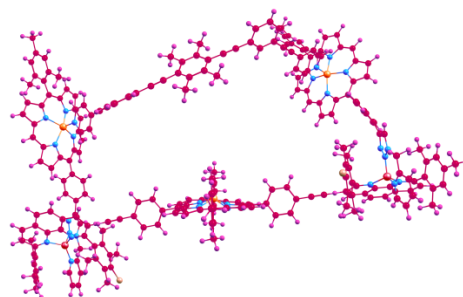

**DS1 = [Cu<sub>2</sub>(S)(R)(P)](PF<sub>6</sub>)<sub>2</sub>**

|   |              |             |               |
|---|--------------|-------------|---------------|
| C | -5.119600000 | 7.351800000 | -9.422200000  |
| C | -4.921900000 | 8.743300000 | -9.395800000  |
| C | -4.687100000 | 6.574800000 | -8.333700000  |
| C | -4.265800000 | 9.357800000 | -8.312700000  |
| H | -5.269200000 | 9.329700000 | -10.197300000 |
| C | -4.036200000 | 7.171300000 | -7.238100000  |

|    |              |              |               |   |               |              |               |
|----|--------------|--------------|---------------|---|---------------|--------------|---------------|
| H  | -4.855900000 | 5.536500000  | -8.339400000  | H | -4.370900000  | 11.275300000 | -9.291800000  |
| C  | -3.827700000 | 8.567800000  | -7.226200000  | C | -3.585400000  | 6.303000000  | -6.083400000  |
| C  | -3.165500000 | 9.194400000  | -6.060700000  | H | -2.507900000  | 6.403400000  | -5.944500000  |
| C  | -1.844800000 | 9.353500000  | -6.011300000  | H | -4.097300000  | 6.610300000  | -5.170200000  |
| C  | -3.936100000 | 9.760900000  | -4.983900000  | H | -3.814500000  | 5.254300000  | -6.276600000  |
| N  | -1.087600000 | 10.006800000 | -4.980400000  | C | -5.993100000  | 11.087700000 | -0.992300000  |
| C  | -1.008100000 | 9.038200000  | -7.163000000  | C | -6.342300000  | 9.948900000  | -0.244500000  |
| N  | -3.416700000 | 10.425800000 | -3.823000000  | C | -6.888900000  | 12.170500000 | -1.068700000  |
| C  | -5.277300000 | 9.737700000  | -5.002800000  | C | -7.581300000  | 9.884600000  | 0.411600000   |
| Zn | -1.606000000 | 10.153100000 | -3.054900000  | H | -5.687300000  | 9.130800000  | -0.194000000  |
| C  | 0.090300000  | 10.130300000 | -5.522400000  | C | -8.132100000  | 12.104900000 | -0.414900000  |
| C  | 0.166500000  | 9.590400000  | -6.889100000  | H | -6.643800000  | 13.021000000 | -1.638900000  |
| H  | -1.283100000 | 8.564900000  | -8.053100000  | C | -8.480000000  | 10.962100000 | 0.327500000   |
| C  | -4.622000000 | 10.663400000 | -3.081400000  | H | -7.837600000  | 9.025400000  | 0.957400000   |
| C  | -5.722200000 | 10.322800000 | -3.770200000  | H | -8.801400000  | 12.915000000 | -0.490700000  |
| H  | -5.893000000 | 9.314100000  | -5.733900000  | C | 2.538000000   | 10.698700000 | -5.719000000  |
| N  | 0.109100000  | 11.141300000 | -2.832800000  | C | 2.775800000   | 11.852300000 | -6.488300000  |
| N  | -2.255800000 | 11.465000000 | -1.705200000  | C | 3.431300000   | 9.614000000  | -5.782200000  |
| C  | 1.306700000  | 10.613600000 | -4.918300000  | C | 3.899000000   | 11.917900000 | -7.326900000  |
| H  | 1.000900000  | 9.581300000  | -7.519300000  | H | 2.101000000   | 12.660000000 | -6.453200000  |
| C  | -4.708600000 | 11.117000000 | -1.717200000  | C | 4.555200000   | 9.679600000  | -6.622500000  |
| H  | -6.713300000 | 10.359100000 | -3.438900000  | H | 3.251600000   | 8.744600000  | -5.222600000  |
| C  | 0.560600000  | 11.726500000 | -1.760600000  | C | 4.785600000   | 10.830600000 | -7.397300000  |
| C  | 1.255400000  | 11.092000000 | -3.680500000  | H | 4.061900000   | 12.780600000 | -7.909600000  |
| C  | -1.476900000 | 11.839600000 | -0.558200000  | H | 5.213200000   | 8.864300000  | -6.680500000  |
| C  | -3.573200000 | 11.477600000 | -1.122100000  | C | -9.750300000  | 10.871900000 | 0.971500000   |
| C  | 1.972000000  | 12.122200000 | -1.857600000  | C | 5.897000000   | 10.906400000 | -8.280400000  |
| C  | -0.150800000 | 11.950400000 | -0.526400000  | C | -10.824900000 | 10.802100000 | 1.512600000   |
| C  | 2.413000000  | 11.706400000 | -3.038700000  | C | 6.829300000   | 10.989400000 | -9.036500000  |
| C  | -2.298500000 | 12.133600000 | 0.616300000   | H | -11.738400000 | 10.744400000 | 1.970300000   |
| C  | -3.564700000 | 11.925100000 | 0.272700000   | C | -12.694000000 | 10.686100000 | 2.429100000   |
| H  | 2.544300000  | 12.606100000 | -1.128900000  | C | -13.846700000 | 10.716400000 | 1.618600000   |
| C  | 0.561900000  | 12.362500000 | 0.702100000   | C | -12.831700000 | 10.605100000 | 3.835400000   |
| H  | 3.380700000  | 11.813400000 | -3.418600000  | C | -15.113300000 | 10.704300000 | 2.227000000   |
| H  | -1.966600000 | 12.456500000 | 1.554100000   | H | -13.756400000 | 10.795700000 | 0.573700000   |
| H  | -4.392800000 | 12.051900000 | 0.899000000   | C | -15.148000000 | 10.624800000 | 3.626300000   |
| C  | 0.809300000  | 13.729200000 | 0.963100000   | C | -16.328700000 | 10.805900000 | 1.524000000   |
| C  | 0.975700000  | 11.380500000 | 1.628900000   | C | -16.373800000 | 10.651000000 | 4.316700000   |
| C  | 1.491500000  | 14.097800000 | 2.137700000   | C | -17.555900000 | 10.861900000 | 2.218200000   |
| C  | 0.403200000  | 14.813500000 | -0.012500000  | H | -16.326500000 | 10.858000000 | 0.473400000   |
| C  | 1.626100000  | 11.772500000 | 2.813600000   | C | -17.584200000 | 10.803400000 | 3.624800000   |
| C  | 0.684800000  | 9.912900000  | 1.400700000   | H | -18.451900000 | 10.969800000 | 1.676300000   |
| C  | 1.907600000  | 13.126500000 | 3.064500000   | C | -18.748000000 | 10.940300000 | 4.403200000   |
| H  | 1.686600000  | 15.113300000 | 2.331600000   | C | -17.376200000 | 10.771400000 | 6.414300000   |
| H  | 1.083600000  | 14.812800000 | -0.865000000  | C | -18.638100000 | 10.936100000 | 5.807500000   |
| H  | -0.615000000 | 14.645700000 | -0.364200000  | H | -19.685700000 | 11.077200000 | 3.950600000   |
| H  | 0.443200000  | 15.792700000 | 0.466900000   | H | -19.494600000 | 11.070600000 | 6.400400000   |
| H  | 1.910900000  | 11.045100000 | 3.517900000   | H | 7.632400000   | 11.037400000 | -9.659600000  |
| H  | -0.386100000 | 9.732600000  | 1.504400000   | C | 8.482700000   | 11.070200000 | -10.285900000 |
| H  | 1.005300000  | 9.619000000  | 0.400300000   | C | 9.636100000   | 10.365900000 | -9.880800000  |
| H  | 1.216800000  | 9.298200000  | 2.128100000   | C | 8.466100000   | 11.736800000 | -11.530900000 |
| C  | 2.578300000  | 13.545100000 | 4.350000000   | C | 10.776900000  | 10.382600000 | -10.700500000 |
| H  | 1.820500000  | 13.866700000 | 5.066000000   | H | 9.646500000   | 9.854800000  | -8.960600000  |
| H  | 3.140300000  | 12.712300000 | 4.774800000   | C | 10.661100000  | 11.055000000 | -11.924700000 |
| H  | 3.266000000  | 14.370600000 | 4.160600000   | C | 12.001000000  | 9.767400000  | -10.375700000 |
| C  | -5.865300000 | 6.710100000  | -10.566400000 | C | 11.759100000  | 11.145500000 | -12.802500000 |
| H  | -6.933800000 | 6.707200000  | -10.345900000 | C | 13.109400000  | 9.880200000  | -11.241600000 |
| H  | -5.691200000 | 7.266100000  | -11.488700000 | H | 12.098800000  | 9.236000000  | -9.474300000  |
| H  | -5.526000000 | 5.683000000  | -10.708400000 | C | 13.000300000  | 10.591400000 | -12.453600000 |
| C  | -4.080100000 | 10.860400000 | -8.325600000  | H | 14.022200000  | 9.436700000  | -10.969500000 |
| H  | -4.698500000 | 11.314300000 | -7.550300000  | C | 14.062300000  | 10.800600000 | -13.351600000 |
| H  | -3.033900000 | 11.109700000 | -8.144700000  | C | 12.537300000  | 12.040600000 | -14.802400000 |

|   |               |              |               |    |               |              |               |
|---|---------------|--------------|---------------|----|---------------|--------------|---------------|
| C | 13.829600000  | 11.549000000 | -14.522000000 | H  | 10.862100000  | 14.739100000 | -20.212100000 |
| H | 15.022000000  | 10.424700000 | -13.146800000 | C  | -11.661800000 | 13.192300000 | 4.333000000   |
| H | 14.621200000  | 11.729600000 | -15.190100000 | H  | -11.073700000 | 13.397100000 | 3.437300000   |
| N | -16.318700000 | 10.618700000 | 5.636400000   | H  | -12.704300000 | 13.063000000 | 4.048500000   |
| N | -14.047500000 | 10.571500000 | 4.356100000   | H  | -11.612900000 | 14.050400000 | 5.002900000   |
| N | 9.545600000   | 11.665600000 | -12.288800000 | C  | -9.339900000  | 13.387300000 | 6.139600000   |
| N | 11.570000000  | 11.803700000 | -13.934500000 | H  | -8.315100000  | 13.262600000 | 6.489300000   |
| C | 7.358600000   | 12.631200000 | -11.919800000 | H  | -9.300700000  | 13.979800000 | 5.224500000   |
| C | 6.312000000   | 12.216400000 | -12.773000000 | H  | -9.915000000  | 13.923600000 | 6.895400000   |
| C | 7.414100000   | 13.966000000 | -11.452600000 | C  | -9.503500000  | 8.393300000  | 6.935100000   |
| C | 5.403500000   | 13.178300000 | -13.275100000 | H  | -9.470300000  | 7.532100000  | 6.268300000   |
| C | 6.424200000   | 14.890900000 | -11.851700000 | H  | -8.489800000  | 8.566400000  | 7.294200000   |
| C | 5.492800000   | 14.516300000 | -12.839700000 | H  | -10.145700000 | 8.164600000  | 7.787900000   |
| C | 12.286300000  | 12.843000000 | -16.009400000 | C  | -11.547500000 | 8.135500000  | 4.807000000   |
| C | 12.222300000  | 14.249700000 | -15.894000000 | H  | -11.651600000 | 7.459300000  | 5.652200000   |
| C | 12.163800000  | 12.233800000 | -17.277100000 | H  | -12.500100000 | 8.178800000  | 4.283000000   |
| C | 11.956000000  | 15.028500000 | -17.035000000 | H  | -10.796300000 | 7.733500000  | 4.126200000   |
| C | 11.908800000  | 13.032900000 | -18.407700000 | C  | -17.540100000 | 13.412900000 | 7.694600000   |
| C | 11.752400000  | 14.424500000 | -18.287000000 | H  | -17.229600000 | 14.299300000 | 8.250300000   |
| H | 11.923000000  | 16.076500000 | -16.954400000 | H  | -17.015500000 | 13.406500000 | 6.738900000   |
| H | 11.843000000  | 12.586000000 | -19.357500000 | H  | -18.614300000 | 13.471800000 | 7.513100000   |
| C | -11.655900000 | 10.675100000 | 4.721300000   | C  | -17.150100000 | 8.331900000  | 8.117400000   |
| C | -11.100500000 | 9.505700000  | 5.283300000   | H  | -16.895800000 | 8.300000000  | 7.059700000   |
| C | -11.112500000 | 11.946400000 | 5.011500000   | H  | -16.493700000 | 7.645700000  | 8.655100000   |
| C | -10.042700000 | 9.618200000  | 6.213700000   | H  | -18.183400000 | 8.004500000  | 8.240400000   |
| C | -9.993200000  | 12.043600000 | 5.866300000   | C  | -16.414700000 | 11.291400000 | 12.120700000  |
| C | -9.522000000  | 10.890800000 | 6.526100000   | H  | -16.008000000 | 12.282900000 | 12.327200000  |
| C | -17.214300000 | 10.878600000 | 7.875800000   | H  | -17.331900000 | 11.154000000 | 12.694000000  |
| C | -17.229600000 | 12.155800000 | 8.481900000   | H  | -15.681000000 | 10.545200000 | 12.430000000  |
| C | -17.006100000 | 9.731500000  | 8.672400000   | B  | 4.430700000   | 15.687200000 | -13.487700000 |
| C | -16.987900000 | 12.277600000 | 9.863300000   | B  | -8.278400000  | 11.035400000 | 7.691400000   |
| C | -16.771900000 | 9.873600000  | 10.053900000  | Cu | 9.754800000   | 12.069000000 | -14.065900000 |
| C | -16.708500000 | 11.145900000 | 10.647400000  | Cu | -14.560100000 | 10.395400000 | 6.113600000   |
| H | -16.994100000 | 13.229100000 | 10.312900000  | N  | -13.967600000 | 11.539100000 | 7.418600000   |
| H | -16.625100000 | 9.018000000  | 10.649500000  | C  | -13.602800000 | 11.048300000 | 8.602000000   |
| C | 6.100800000   | 10.743000000 | -13.059100000 | C  | -14.124700000 | 12.829200000 | 7.179200000   |
| H | 6.956600000   | 10.148300000 | -12.746200000 | C  | -13.428900000 | 11.947100000 | 9.675900000   |
| H | 5.222500000   | 10.393300000 | -12.511900000 | C  | -13.375300000 | 9.569000000  | 8.932600000   |
| H | 5.938500000   | 10.584700000 | -14.122700000 | C  | -13.960100000 | 13.778500000 | 8.198900000   |
| C | 4.347600000   | 12.840300000 | -14.310100000 | H  | -14.448900000 | 13.139200000 | 6.229200000   |
| H | 4.156400000   | 11.771300000 | -14.363900000 | C  | -13.625300000 | 13.323200000 | 9.481700000   |
| H | 3.408200000   | 13.332800000 | -14.057100000 | H  | -13.189500000 | 11.590300000 | 10.635600000  |
| H | 4.674900000   | 13.190800000 | -15.290700000 | H  | -12.342700000 | 9.481600000  | 9.284600000   |
| C | 6.396900000   | 16.298100000 | -11.290100000 | H  | -14.029200000 | 9.303500000  | 9.768300000   |
| H | 7.134900000   | 16.910500000 | -11.808500000 | N  | -13.564800000 | 8.558800000  | 7.904900000   |
| H | 5.411400000   | 16.747500000 | -11.409100000 | H  | -14.140100000 | 14.796800000 | 8.018600000   |
| H | 6.618800000   | 16.285300000 | -10.221700000 | H  | -13.548500000 | 13.994500000 | 10.285900000  |
| C | 8.474400000   | 14.376800000 | -10.441800000 | C  | -13.403800000 | 7.162900000  | 8.043900000   |
| H | 8.101800000   | 14.175300000 | -9.435600000  | N  | -14.213600000 | 8.727400000  | 6.737200000   |
| H | 9.403400000   | 13.827600000 | -10.593600000 | C  | -13.952300000 | 6.616900000  | 6.945500000   |
| H | 8.710300000   | 15.436700000 | -10.531800000 | H  | -12.890900000 | 6.664900000  | 8.806600000   |
| C | 12.427500000  | 10.758000000 | -17.479400000 | N  | -14.460900000 | 7.672100000  | 6.150800000   |
| H | 13.503800000  | 10.599100000 | -17.575500000 | C  | -13.906000000 | 5.230900000  | 6.473800000   |
| H | 12.052400000  | 10.178000000 | -16.636300000 | C  | -12.818100000 | 4.389200000  | 6.772000000   |
| H | 11.937700000  | 10.406200000 | -18.388300000 | C  | -14.887000000 | 4.794700000  | 5.563400000   |
| C | 12.588700000  | 14.962700000 | -14.607500000 | C  | -12.687200000 | 3.149200000  | 6.124600000   |
| H | 12.223900000  | 14.416600000 | -13.738300000 | H  | -12.063900000 | 4.705000000  | 7.432400000   |
| H | 13.675100000  | 15.046000000 | -14.541200000 | C  | -14.762800000 | 3.551800000  | 4.923300000   |
| H | 12.157400000  | 15.964900000 | -14.591800000 | H  | -15.702400000 | 5.415100000  | 5.325400000   |
| C | 11.499300000  | 15.274800000 | -19.507400000 | C  | -13.643300000 | 2.740100000  | 5.178300000   |
| H | 11.000400000  | 16.202300000 | -19.222500000 | H  | -11.848200000 | 2.546100000  | 6.319300000   |
| H | 12.448100000  | 15.512600000 | -19.989700000 | H  | -15.486900000 | 3.253600000  | 4.221500000   |

|    |               |               |               |    |              |              |               |
|----|---------------|---------------|---------------|----|--------------|--------------|---------------|
| C  | -13.44300000  | 1.488700000   | 4.429100000   | C  | 7.872600000  | 15.613900000 | -16.312300000 |
| C  | -12.917700000 | 1.503900000   | 3.198700000   | H  | 6.858100000  | 14.130700000 | -17.444300000 |
| C  | -13.944700000 | 0.241200000   | 4.966100000   | H  | 6.503400000  | 11.800400000 | -16.263600000 |
| N  | -12.733600000 | 0.394700000   | 2.314800000   | H  | 7.787600000  | 11.757900000 | -17.473500000 |
| C  | -12.647100000 | 2.744300000   | 2.467100000   | N  | 8.126700000  | 10.620200000 | -15.797500000 |
| N  | -13.750400000 | -1.052400000  | 4.414600000   | H  | 9.031500000  | 16.786100000 | -14.951500000 |
| C  | -14.754000000 | 0.166800000   | 6.036500000   | H  | 7.486600000  | 16.427100000 | -16.853700000 |
| Zn | -12.761400000 | -1.528400000  | 2.782600000   | C  | 7.676500000  | 9.280500000  | -15.930600000 |
| C  | -12.485100000 | 0.919100000   | 1.153500000   | N  | 9.074400000  | 10.583500000 | -14.851000000 |
| C  | -12.438800000 | 2.382400000   | 1.201900000   | C  | 8.417700000  | 8.568200000  | -15.065100000 |
| H  | -12.707100000 | 3.724300000   | 2.825700000   | H  | 6.896200000  | 8.930700000  | -16.532300000 |
| C  | -14.455100000 | -1.925700000  | 5.285100000   | N  | 9.271300000  | 9.459200000  | -14.392000000 |
| C  | -15.078300000 | -1.228800000  | 6.246000000   | C  | 8.395300000  | 7.167200000  | -14.654100000 |
| H  | -15.098900000 | 0.964400000   | 6.618400000   | C  | 7.767300000  | 6.823700000  | -13.442200000 |
| N  | -12.450000000 | -2.003500000  | 0.891100000   | C  | 9.342800000  | 6.291400000  | -15.211800000 |
| N  | -13.263000000 | -3.409400000  | 3.084400000   | C  | 8.117200000  | 5.638900000  | -12.771800000 |
| C  | -12.237500000 | 0.244400000   | -0.099300000  | H  | 7.102300000  | 7.496900000  | -12.982500000 |
| H  | -12.271200000 | 3.026100000   | 0.394600000   | C  | 9.690800000  | 5.105800000  | -14.542300000 |
| C  | -14.441800000 | -3.366900000  | 5.252200000   | H  | 9.865600000  | 6.569400000  | -16.081400000 |
| H  | -15.642600000 | -1.618700000  | 7.035100000   | C  | 9.113200000  | 4.795300000  | -13.295400000 |
| C  | -12.370400000 | -3.180800000  | 0.347700000   | H  | 7.679800000  | 5.421400000  | -11.840800000 |
| C  | -12.240000000 | -1.083900000  | -0.170700000  | H  | 10.439300000 | 4.488400000  | -14.947500000 |
| C  | -12.927700000 | -4.522000000  | 2.271400000   | C  | 9.576200000  | 3.626200000  | -12.513400000 |
| C  | -13.854100000 | -3.996400000  | 4.236500000   | C  | 10.687800000 | 3.669600000  | -11.772500000 |
| H  | -12.070000000 | 0.811600000   | -0.969600000  | C  | 8.986100000  | 2.330400000  | -12.741800000 |
| H  | -14.876100000 | -3.916600000  | 6.036300000   | N  | 11.353400000 | 2.578800000  | -11.111800000 |
| C  | -12.113000000 | -3.094600000  | -1.099700000  | C  | 11.580200000 | 4.829400000  | -11.830200000 |
| C  | -12.522800000 | -4.469400000  | 1.000100000   | N  | 9.246000000  | 1.122600000  | -12.025900000 |
| C  | -12.027400000 | -1.804000000  | -1.419100000  | C  | 8.202300000  | 2.104000000  | -13.809300000 |
| C  | -13.221700000 | -5.771000000  | 2.985900000   | Zn | 10.637200000 | 0.773200000  | -10.647400000 |
| C  | -13.793000000 | -5.455200000  | 4.150900000   | C  | 12.556100000 | 3.023600000  | -10.904800000 |
| H  | -12.022200000 | -3.894500000  | -1.767400000  | C  | 12.748600000 | 4.402700000  | -11.358900000 |
| C  | -12.263700000 | -5.714800000  | 0.249400000   | H  | 11.400400000 | 5.752200000  | -12.286000000 |
| H  | -11.859500000 | -1.399200000  | -2.368100000  | C  | 8.487000000  | 0.161400000  | -12.755400000 |
| H  | -13.059900000 | -6.742800000  | 2.634200000   | C  | 7.880200000  | 0.701400000  | -13.820200000 |
| H  | -14.141400000 | -6.133400000  | 4.867000000   | H  | 7.911000000  | 2.798100000  | -14.535100000 |
| C  | -10.960600000 | -6.256600000  | 0.256900000   | N  | 12.484200000 | 0.189800000  | -10.190300000 |
| C  | -13.305100000 | -6.377300000  | -0.438300000  | N  | 10.269800000 | -1.161200000 | -10.936900000 |
| C  | -10.713400000 | -7.477700000  | -0.396100000  | C  | 13.695100000 | 2.329600000  | -10.365400000 |
| C  | -9.832900000  | -5.558700000  | 0.986400000   | H  | 13.644400000 | 4.942100000  | -11.343800000 |
| C  | -13.038100000 | -7.600400000  | -1.081900000  | C  | 8.328200000  | -1.230300000 | -12.450000000 |
| C  | -14.716400000 | -5.829600000  | -0.463400000  | H  | 7.284100000  | 0.208000000  | -14.523400000 |
| C  | -11.744400000 | -8.150400000  | -1.074800000  | C  | 12.942500000 | -0.999700000 | -9.927800000  |
| H  | -9.749500000  | -7.897100000  | -0.370800000  | C  | 13.620100000 | 1.035900000  | -10.078400000 |
| H  | -9.723300000  | -4.540700000  | 0.609100000   | C  | 10.983900000 | -2.277500000 | -10.417200000 |
| H  | -10.051400000 | -5.524600000  | 2.054800000   | C  | 9.165800000  | -1.786100000 | -11.583200000 |
| H  | -8.891500000  | -6.087700000  | 0.836900000   | H  | 14.620400000 | 2.826500000  | -10.290100000 |
| H  | -13.815400000 | -8.114200000  | -1.570500000  | H  | 7.612600000  | -1.810900000 | -12.957200000 |
| H  | -15.152300000 | -5.887000000  | 0.534600000   | C  | 14.385000000 | -0.993000000 | -9.641600000  |
| H  | -14.708500000 | -4.790600000  | -0.795100000  | C  | 12.224200000 | -2.257500000 | -9.929400000  |
| H  | -15.338900000 | -6.405000000  | -1.150600000  | C  | 14.801700000 | 0.268400000  | -9.711700000  |
| C  | -11.484700000 | -9.494100000  | -1.710800000  | C  | 10.233900000 | -3.520800000 | -10.625600000 |
| H  | -11.673300000 | -10.282000000 | -0.979900000  | C  | 9.152300000  | -3.226800000 | -11.347600000 |
| H  | -12.141000000 | -9.638300000  | -2.570200000  | H  | 14.986600000 | -1.824600000 | -9.442500000  |
| H  | -10.448900000 | -9.558300000  | -2.046800000  | C  | 12.846700000 | -3.490700000 | -9.392800000  |
| N  | 8.923400000   | 13.465400000  | -14.936500000 | H  | 15.779000000 | 0.618100000  | -9.593500000  |
| C  | 8.071200000   | 13.209700000  | -15.932900000 | H  | 10.534100000 | -4.483400000 | -10.349100000 |
| C  | 9.239600000   | 14.691900000  | -14.557100000 | H  | 8.460400000  | -3.912700000 | -11.729300000 |
| C  | 7.523700000   | 14.297500000  | -16.646700000 | C  | 12.673400000 | -3.786800000 | -8.022900000  |
| C  | 7.587900000   | 11.827900000  | -16.400400000 | C  | 13.562700000 | -4.390000000 | -10.216500000 |
| C  | 8.744100000   | 15.816300000  | -15.234600000 | C  | 13.160700000 | -4.995000000 | -7.497000000  |
| H  | 9.894100000   | 14.824600000  | -13.748300000 | C  | 11.906200000 | -2.865100000 | -7.106000000  |

|   |               |              |               |   |               |              |              |
|---|---------------|--------------|---------------|---|---------------|--------------|--------------|
| C | 14.051400000  | -5.592600000 | -9.668600000  | H | 9.733600000   | -0.622800000 | -5.886100000 |
| C | 13.781400000  | -4.129400000 | -11.691400000 | C | 9.441800000   | 2.205600000  | -8.362400000 |
| C | 13.861700000  | -5.899300000 | -8.310100000  | H | 8.592200000   | 3.355100000  | -6.770500000 |
| H | 12.991300000  | -5.228100000 | -6.485800000  | H | 10.430800000  | -0.847800000 | -8.193400000 |
| H | 12.265000000  | -1.842300000 | -7.225200000  | H | 9.360800000   | 3.001900000  | -9.049800000 |
| H | 10.844600000  | -2.918000000 | -7.350400000  | N | -10.955100000 | -1.621700000 | 3.547300000  |
| H | 12.042200000  | -3.155000000 | -6.064400000  | N | 9.965800000   | 1.054600000  | -8.776700000 |
| H | 14.557900000  | -6.279500000 | -10.283800000 | C | 1.318900000   | 2.053400000  | 5.339100000  |
| H | 12.833600000  | -4.204100000 | -12.225300000 | H | 0.332800000   | 2.336800000  | 5.035600000  |
| H | 14.204100000  | -3.135200000 | -11.838600000 | H | 1.274200000   | 1.575800000  | 6.295600000  |
| H | 14.475400000  | -4.862100000 | -12.108500000 | H | 1.936400000   | 2.924900000  | 5.404200000  |
| C | 14.314700000  | -7.221000000 | -7.741500000  | C | 3.626400000   | 2.886200000  | 3.778100000  |
| H | 13.522500000  | -7.959900000 | -7.871400000  | H | 4.682200000   | 2.807700000  | 3.933500000  |
| H | 15.214800000  | -7.564500000 | -8.251800000  | H | 3.436600000   | 3.500200000  | 2.922600000  |
| H | 14.533200000  | -7.117000000 | -6.677400000  | H | 3.170700000   | 3.325700000  | 4.640700000  |
| C | -9.925100000  | -1.141000000 | 2.863300000   | C | 1.358500000   | -2.464000000 | 2.984700000  |
| C | -10.755700000 | -2.157000000 | 4.745700000   | H | 1.297700000   | -2.966300000 | 3.927400000  |
| C | -8.610800000  | -1.177600000 | 3.368800000   | H | 0.380900000   | -2.390600000 | 2.555900000  |
| H | -10.087000000 | -0.716300000 | 1.916600000   | H | 1.996000000   | -3.016600000 | 2.326500000  |
| C | -9.473800000  | -2.238700000 | 5.328700000   | C | 3.665000000   | -1.637900000 | 1.427100000  |
| H | -11.570500000 | -2.535100000 | 5.289100000   | H | 3.330900000   | -1.395200000 | 0.440100000  |
| C | -8.358200000  | -1.738000000 | 4.632200000   | H | 4.732300000   | -1.574400000 | 1.468100000  |
| H | -7.820800000  | -0.781700000 | 2.795100000   | H | 3.357200000   | -2.632700000 | 1.673400000  |
| H | -9.356200000  | -2.669200000 | 6.277700000   |   |               |              |              |
| C | -7.013700000  | -1.784300000 | 5.158500000   |   |               |              |              |
| C | -5.881100000  | -1.817000000 | 5.588300000   |   |               |              |              |
| C | -4.537500000  | -1.871400000 | 6.132700000   |   |               |              |              |
| C | -4.375100000  | -2.427300000 | 7.416300000   |   |               |              |              |
| C | -3.397000000  | -1.395300000 | 5.442200000   |   |               |              |              |
| C | -3.100100000  | -2.503300000 | 7.998300000   |   |               |              |              |
| H | -5.205100000  | -2.783300000 | 7.959200000   |   |               |              |              |
| C | -2.108400000  | -1.452800000 | 6.024800000   |   |               |              |              |
| H | -3.524100000  | -0.988600000 | 4.482400000   |   |               |              |              |
| C | -1.976300000  | -2.028700000 | 7.303500000   |   |               |              |              |
| H | -2.977800000  | -2.920000000 | 8.953900000   |   |               |              |              |
| H | -1.024300000  | -2.095100000 | 7.747000000   |   |               |              |              |
| C | -0.908200000  | -0.991800000 | 5.343500000   |   |               |              |              |
| C | 0.112800000   | -0.605800000 | 4.812100000   |   |               |              |              |
| C | 1.322700000   | -0.187600000 | 4.119400000   |   |               |              |              |
| C | 1.935500000   | -1.051300000 | 3.192000000   |   |               |              |              |
| C | 1.913800000   | 1.078700000  | 4.305900000   |   |               |              |              |
| C | 3.052700000   | -0.647000000 | 2.434500000   |   |               |              |              |
| C | 3.036200000   | 1.483200000  | 3.544300000   |   |               |              |              |
| C | 3.601900000   | 0.643900000  | 2.559200000   |   |               |              |              |
| C | 4.691000000   | 1.048700000  | 1.670200000   |   |               |              |              |
| C | 5.590100000   | 1.361300000  | 0.912300000   |   |               |              |              |
| C | 6.709500000   | 1.791600000  | 0.070200000   |   |               |              |              |
| C | 7.679200000   | 2.597700000  | 0.697300000   |   |               |              |              |
| C | 6.888200000   | 1.469300000  | -1.304800000  |   |               |              |              |
| C | 8.794300000   | 3.058900000  | -0.019800000  |   |               |              |              |
| H | 7.576000000   | 2.861600000  | 1.712600000   |   |               |              |              |
| C | 8.003200000   | 1.937100000  | -2.056200000  |   |               |              |              |
| H | 6.170200000   | 0.867000000  | -1.781500000  |   |               |              |              |
| C | 8.952100000   | 2.729800000  | -1.377300000  |   |               |              |              |
| H | 9.514900000   | 3.654200000  | 0.466800000   |   |               |              |              |
| H | 9.802400000   | 3.089200000  | -1.884500000  |   |               |              |              |
| C | 8.284200000   | 1.681300000  | -3.488000000  |   |               |              |              |
| C | 8.628100000   | 1.557400000  | -4.654300000  |   |               |              |              |
| C | 9.044100000   | 1.390900000  | -6.067200000  |   |               |              |              |
| C | 9.614800000   | 0.193300000  | -6.541500000  |   |               |              |              |
| C | 8.981200000   | 2.414200000  | -7.036300000  |   |               |              |              |
| C | 10.039700000  | 0.072200000  | -7.885800000  |   |               |              |              |



## 10. References

1. A. Goswami, I. Paul and M. Schmittel, *Chem. Commun.*, 2017, **53**, 5168–5189.
2. S. K. Mamidyala and M. A. Cooper, *Chem. Commun.*, 2013, **49**, 8407–8409.
3. S. Gaikwad, A. Goswami, S. De and M. Schmittel, *Angew. Chem. Int. Ed.*, 2016, **55**, 10512–10517.
4. M. Schmittel and A. Ganz, *Chem. Commun.*, 1997, **49**, 999–1000.
5. A. Goswami, S. Pramanik and M. Schmittel, *Chem. Commun.*, 2018, **54**, 3955–3958.
6. I. Paul, A. Goswami, N. Mittal and M. Schmittel, *Angew. Chem. Int. Ed.*, 2018, **57**, 354–358.
7. I. Paul, A. Goswami, N. Mittal and M. Schmittel, *Angew. Chem. Int. Ed.*, 2018, **57**, 354–358.
8. H. J. Reich, *NMR Spectrum Calculations: WinDNMR*, Version 7.1. 13. Department of Chemistry, University of Wisconsin.
